# Supplementary material for: Exploring the reactivity of L-tellurocystine, Te-protected tellurocysteine conjugates and diorganodiselenides towards hydrogen peroxide: synthesis and molecular structure analysis
Source: Royal Society of Chemistry journal article supplement (doi:10.1039/d2nj00997h), 2022-01-01
Supplement: d2nj00997h1.pdf [file d2nj00997h1.pdf]

## Exploring the reactivity of L-tellurocystine, Te-protected tellurocysteine conjugates and diorganodiselenides towards hydrogen peroxide: Synthesis and molecular structure analysis

Abhishek Tripathi,<sup>[a][b][c]</sup> Rajesh Deka,<sup>[a][b][c]</sup> Ray J. Butcher,<sup>[d]</sup> David R. Turner,<sup>[b][c]</sup> Glen B. Deacon,<sup>\*[b][c]</sup> and Harkesh B. Singh,<sup>\*[a][b]</sup>

[a] Department of Chemistry, Indian Institute of Technology Bombay, Mumbai 400076, India

[b] IITB-Monash Research Academy, Powai, Mumbai 400076, India

[c] School of Chemistry, Monash University, Clayton, Victoria 3800, Australia

[d] Department of Chemistry, Howard University, Washington, D. C. 20059, USA

---

| <b>Contents</b>                                                                                         | <b>Page No.</b> |
|---------------------------------------------------------------------------------------------------------|-----------------|
| Spectral data                                                                                           | <b>S2-S21</b>   |
| Mechanism for the synthesis of <b>9</b>                                                                 | <b>S22</b>      |
| Crystallographic data and structure refinement details of <b>5</b> ,<br><b>8, 9, 14, 15, 16, and 17</b> | <b>S23</b>      |
| Molecular structures of <b>15-17</b>                                                                    | <b>S24</b>      |
| The important geometric parameters of <b>5, 8, and 9</b>                                                | <b>S24-S26</b>  |
| Comparison of the geometrical parameters of <b>14-17</b>                                                | <b>S26</b>      |
| Packing diagrams of compounds <b>5, 8, 9, 14, 15, 16, and 17</b>                                        | <b>S27-S31</b>  |

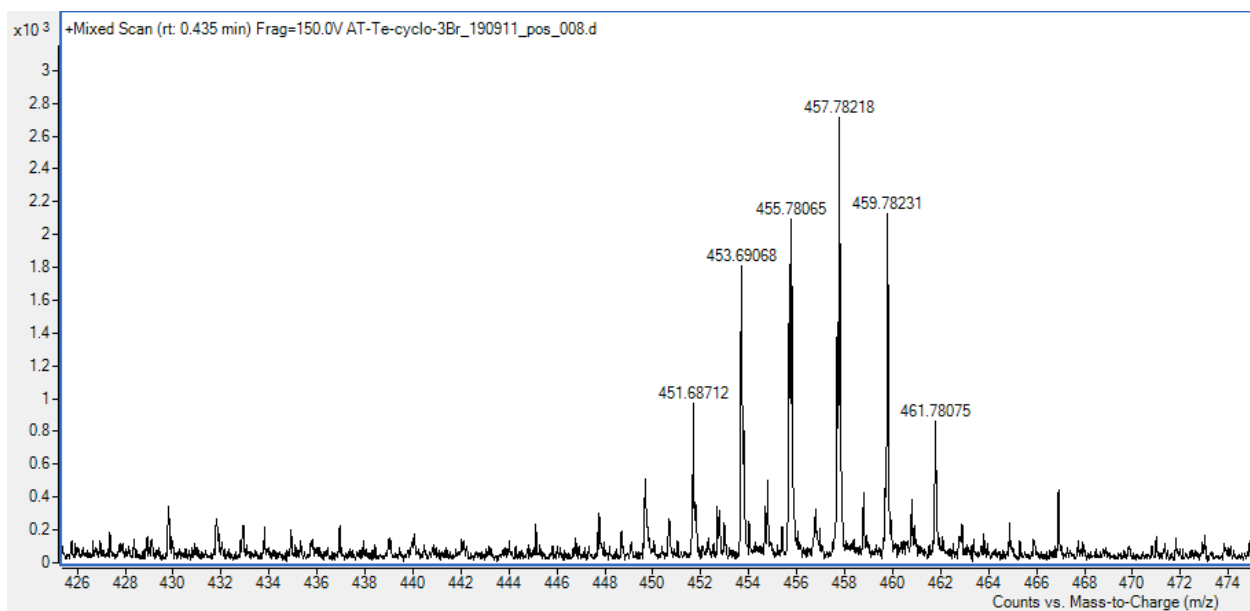

**Figure S1.** HR-MS spectrum of compound **5**

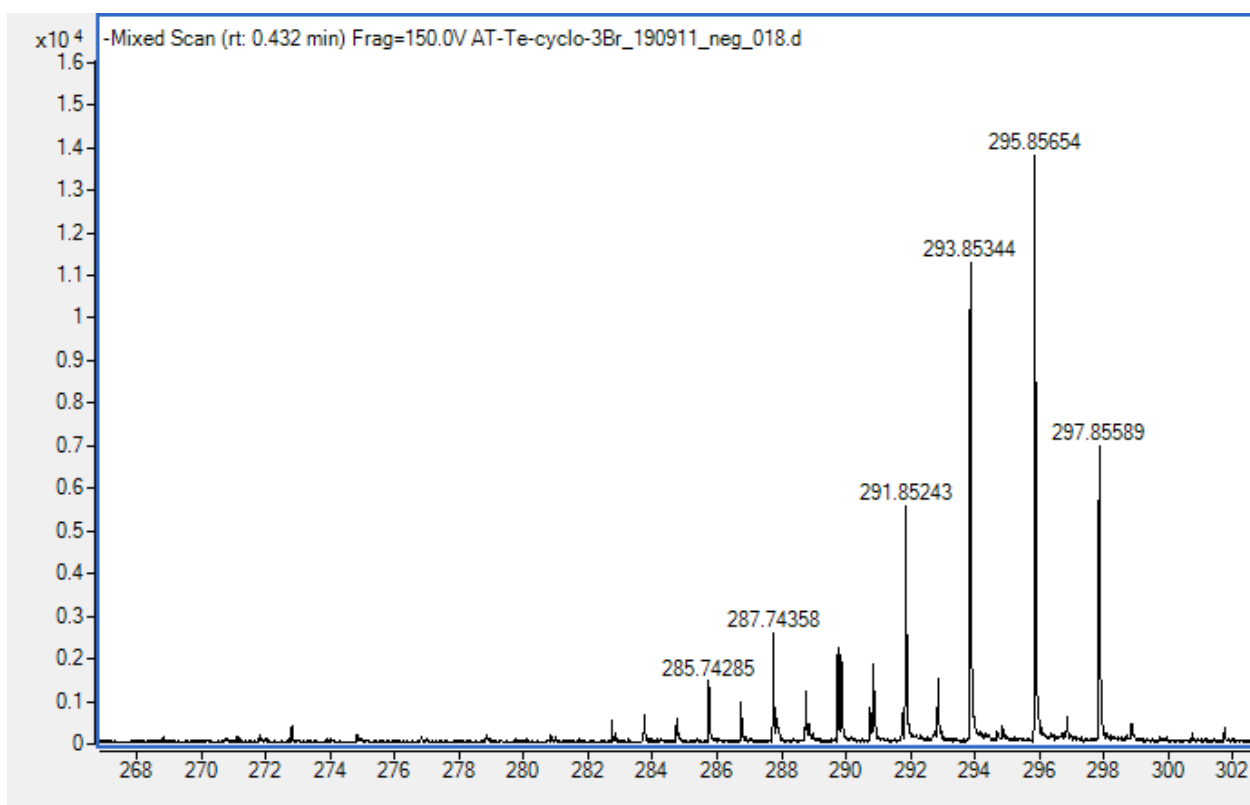

**Figure S2.** HR-MS spectrum of compound **5**

Agilent Resolutions Pro

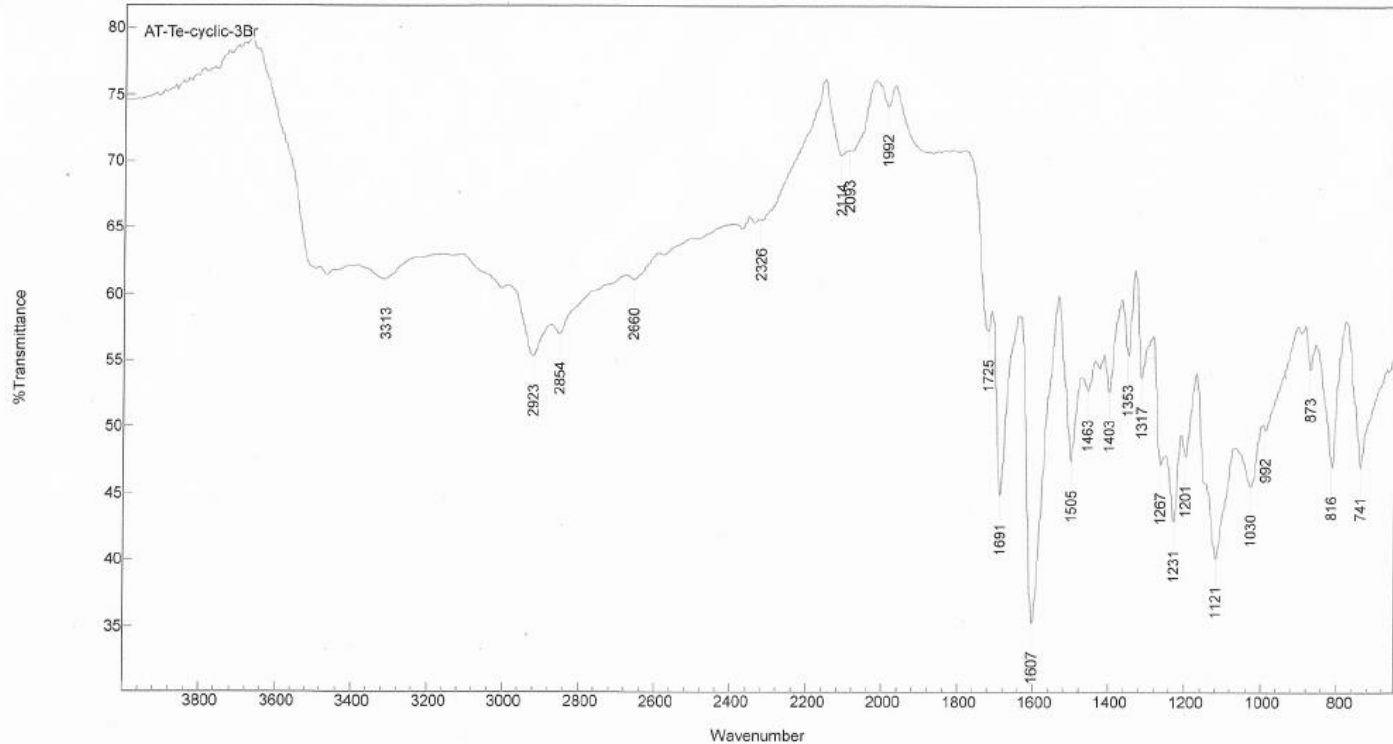

Figure S3. FT-IR spectrum of compound 5

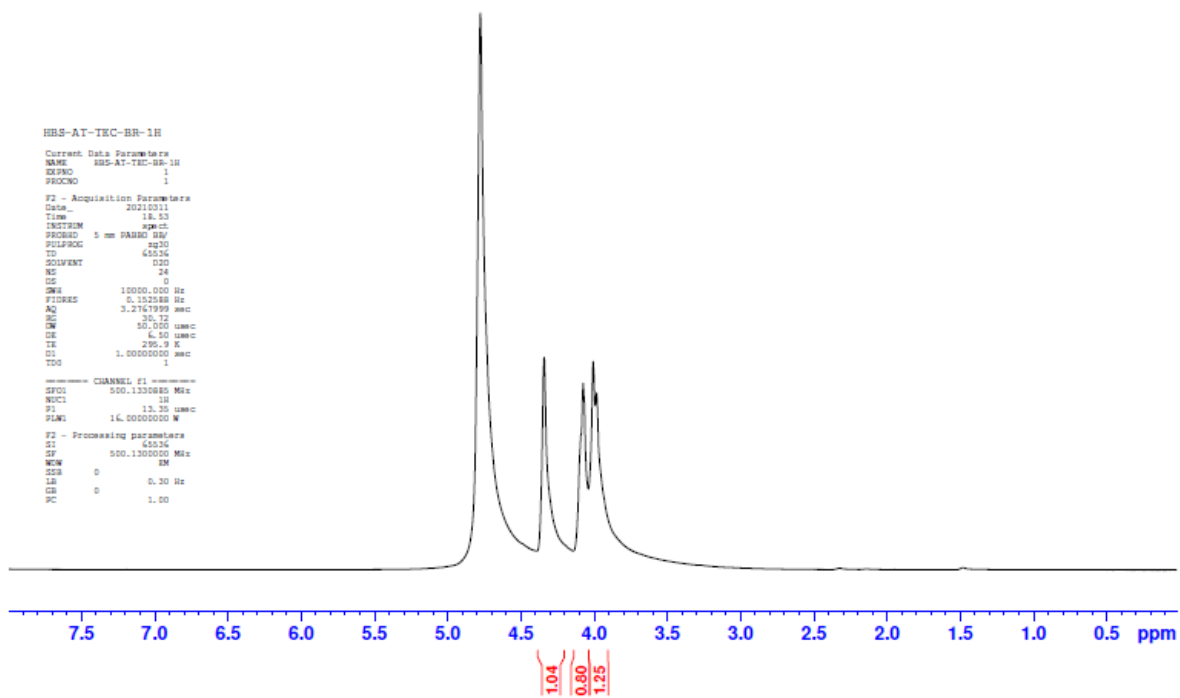

Figure S4. <sup>1</sup>H NMR spectrum of compound 5

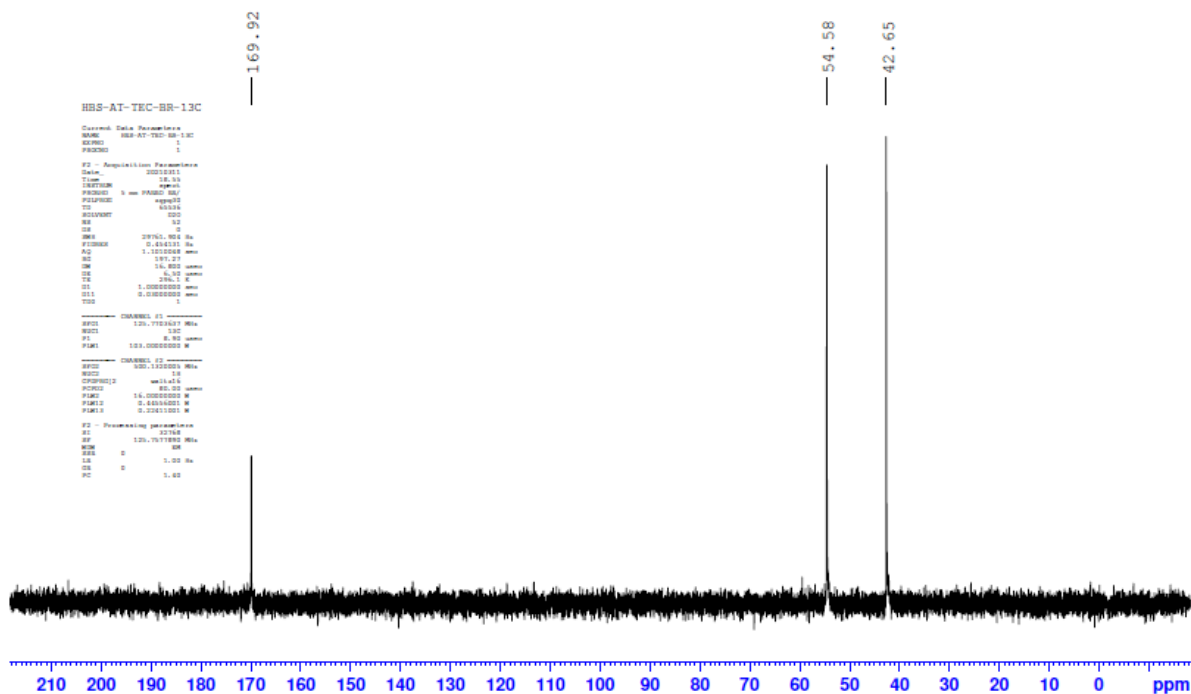

Figure S5.  $^{13}\text{C}$  NMR spectrum of compound 5

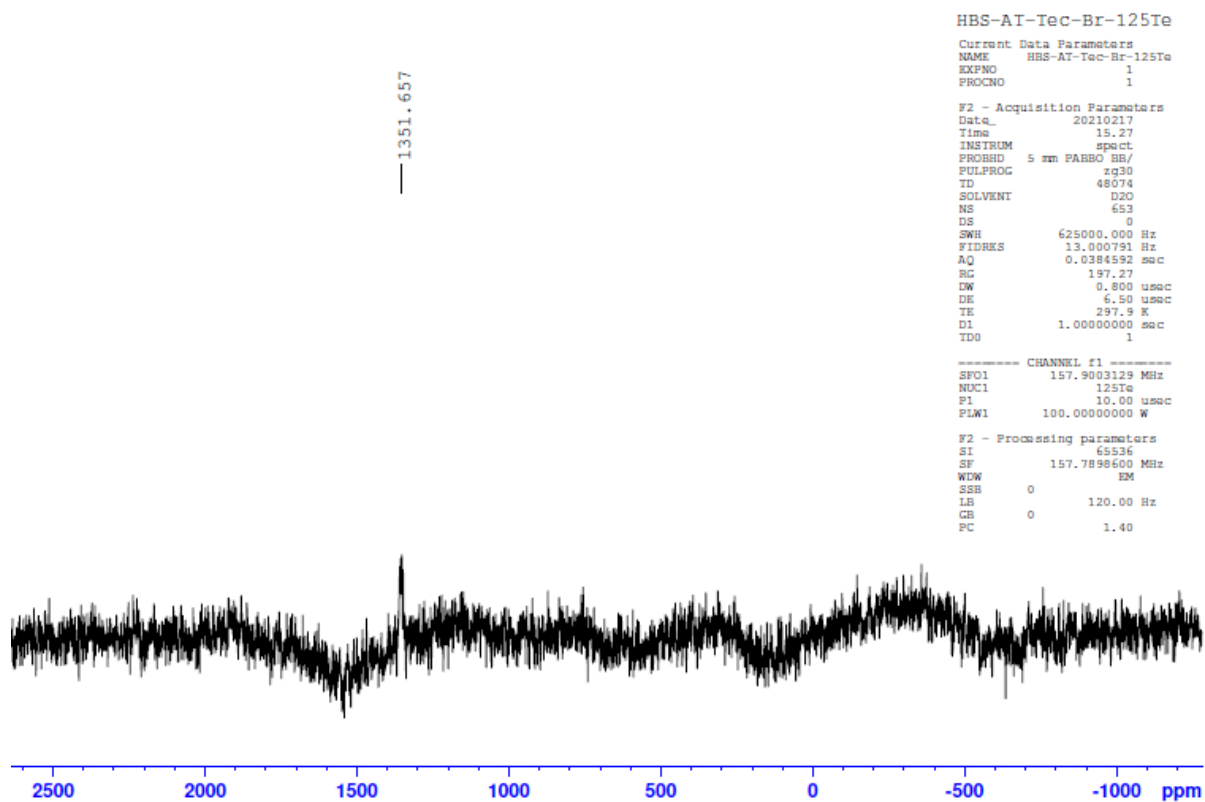

Figure S6.  $^{125}\text{Te}$  NMR spectrum of compound 5

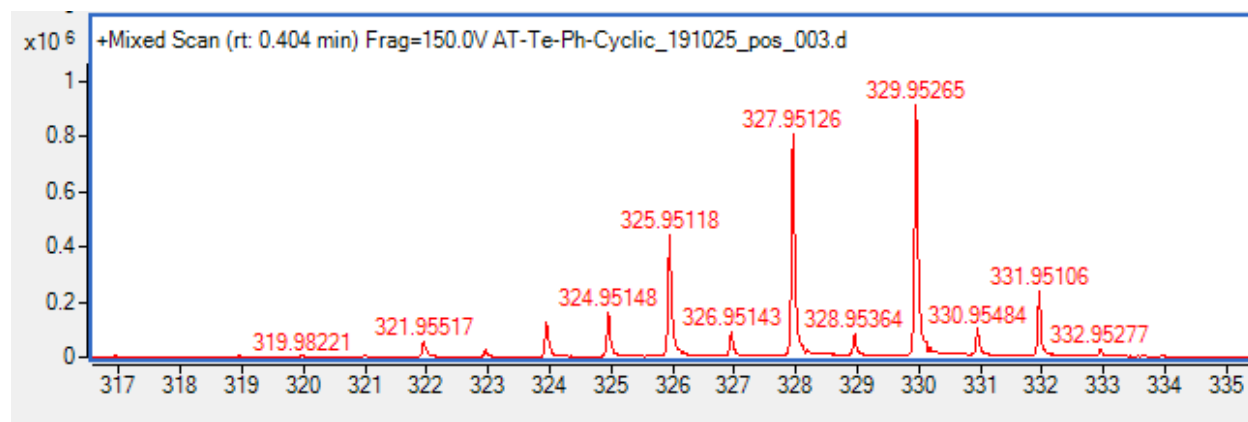

**Figure S7.** HR-MS spectrum of compound **8**

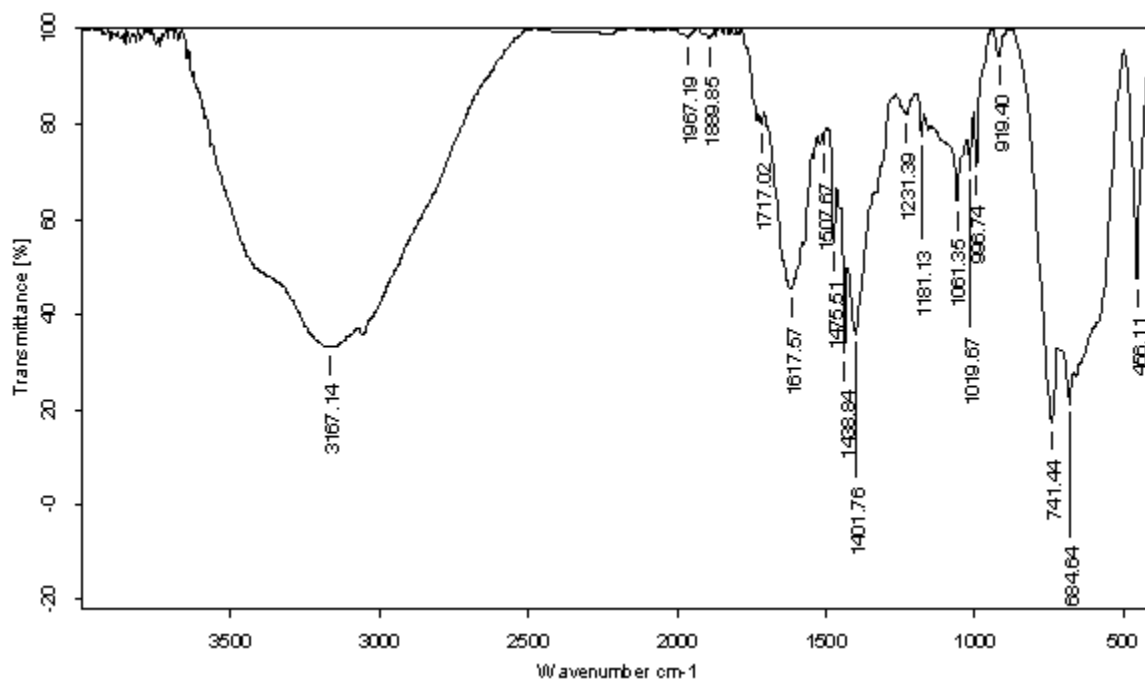

**Figure S8.** FT-IR spectrum of compound **8**

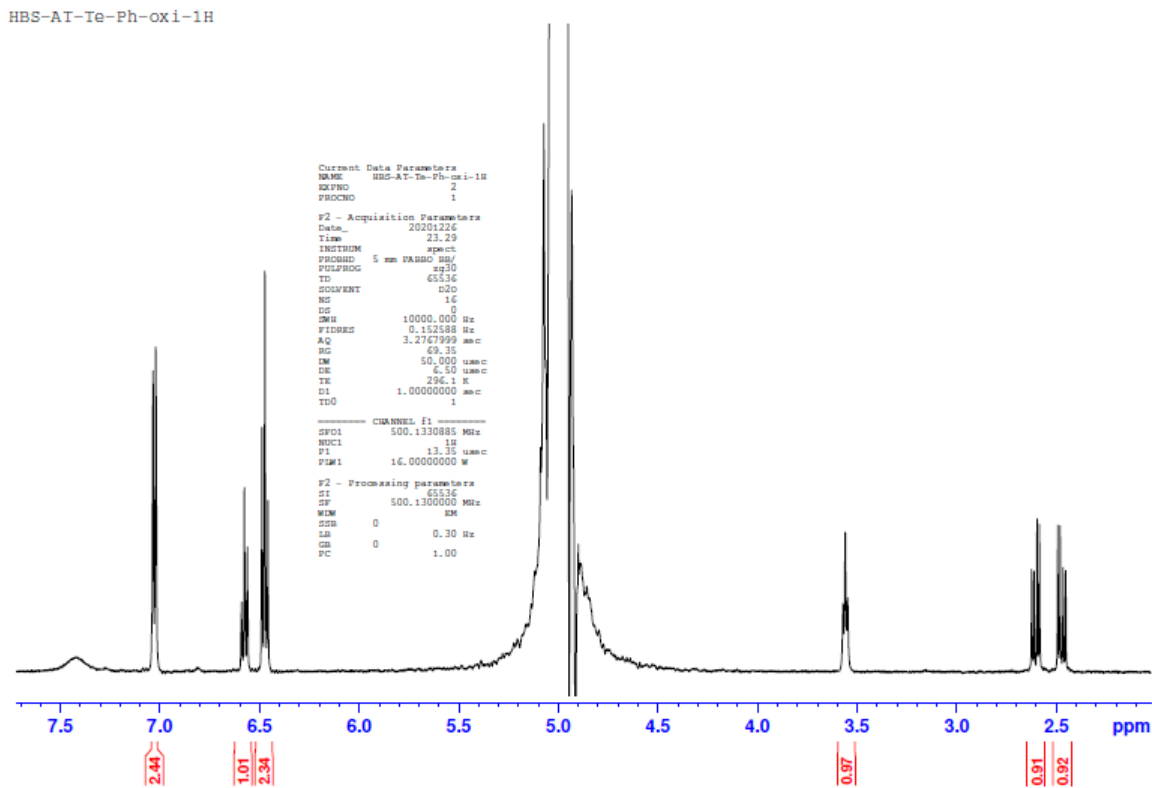

Figure S9. <sup>1</sup>H NMR spectrum of compound **8**

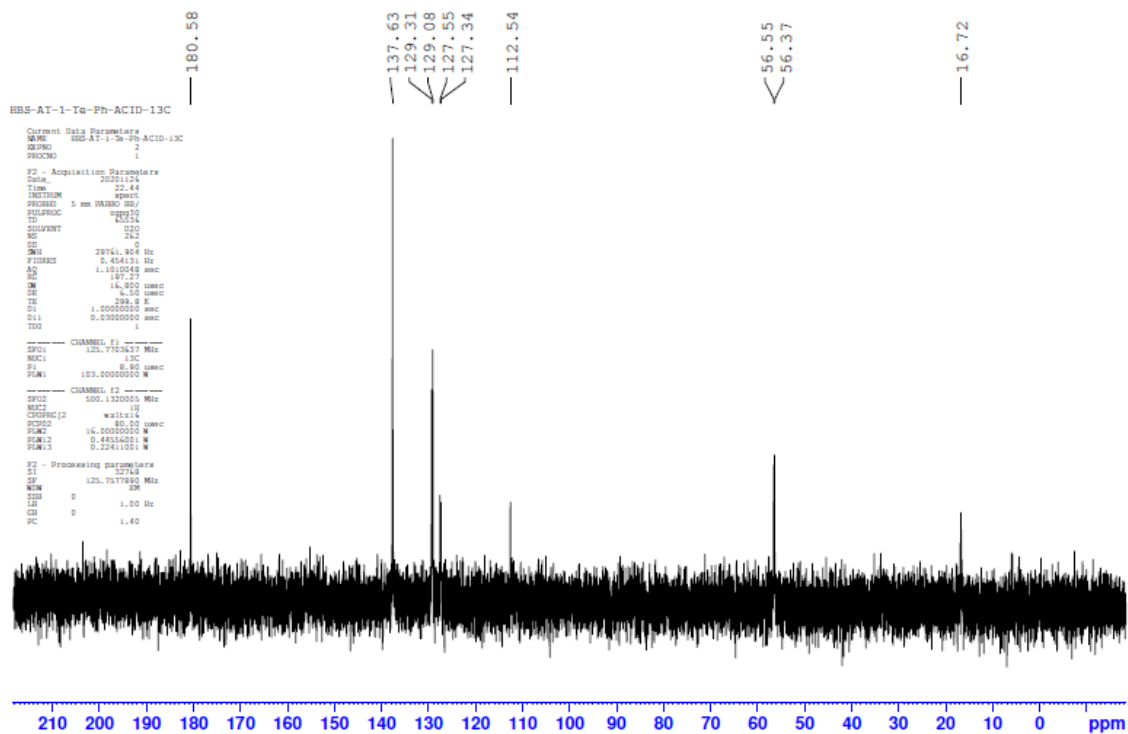

Figure S10. <sup>13</sup>C NMR spectrum of compound **8**

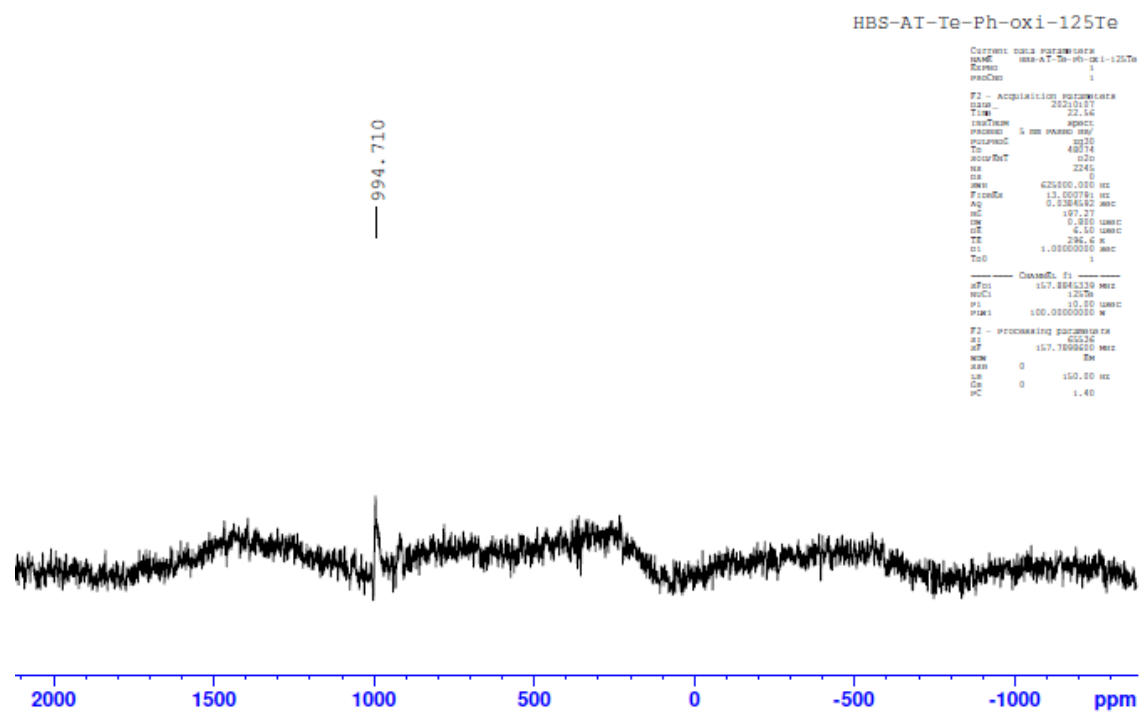

**Figure S11.**  $^{125}\text{Te}$  NMR spectrum of compound **8**

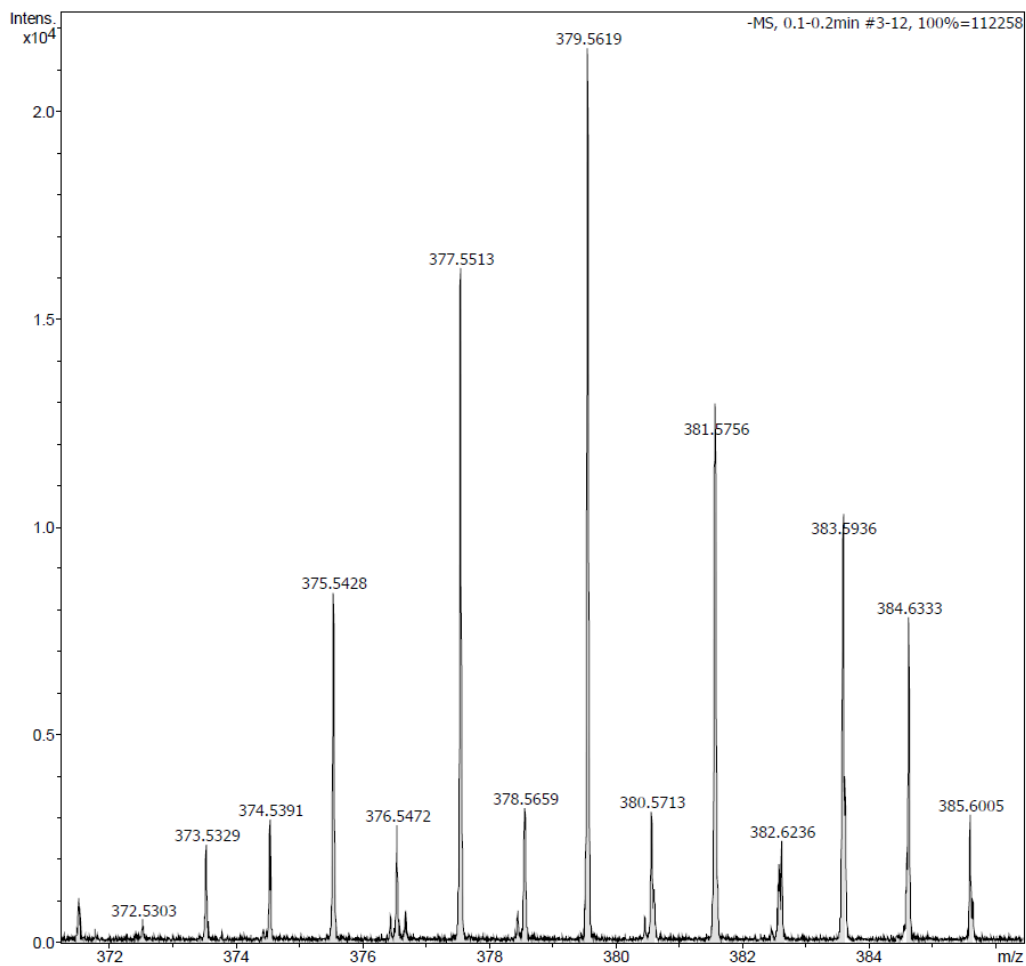

**Figure S12.** HR-MS spectrum of compound **9**



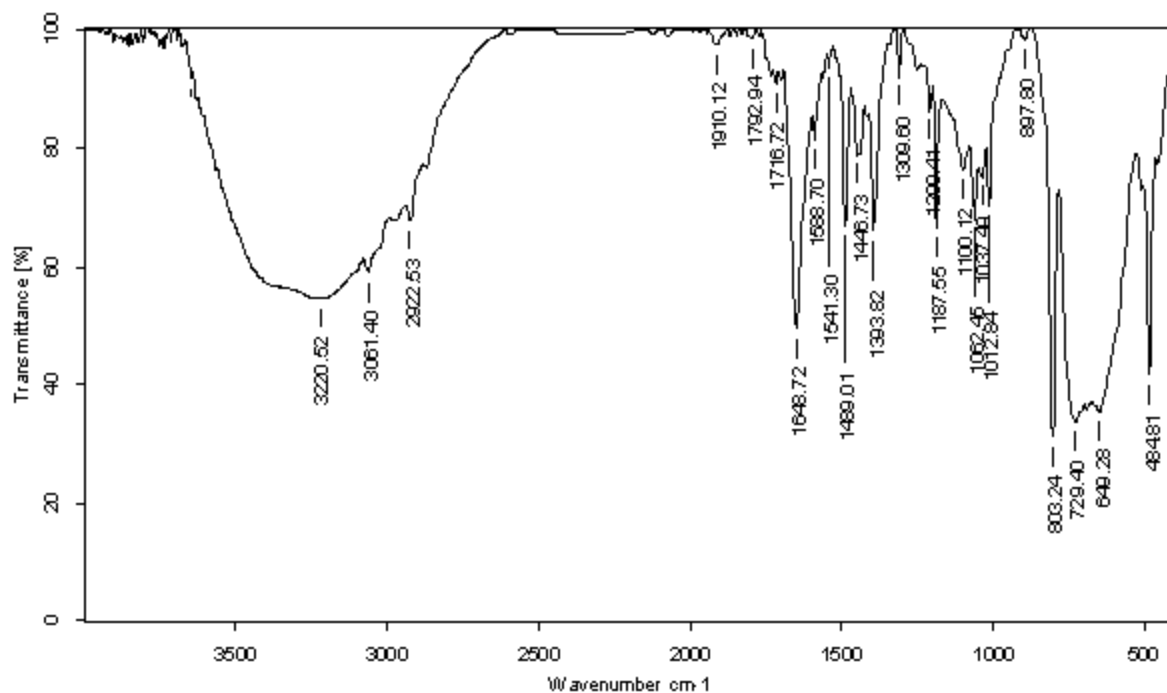

Figure S13. FT-IR spectrum of compound 9

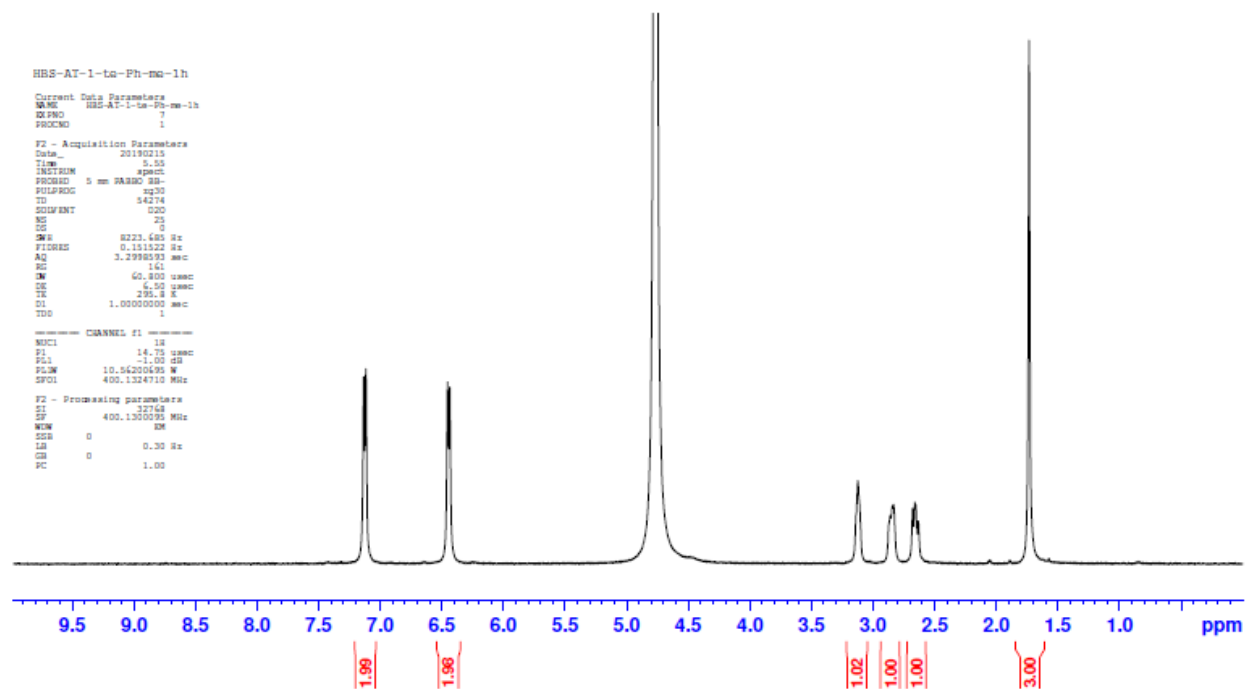

Figure S14. <sup>1</sup>H NMR spectrum of compound 9

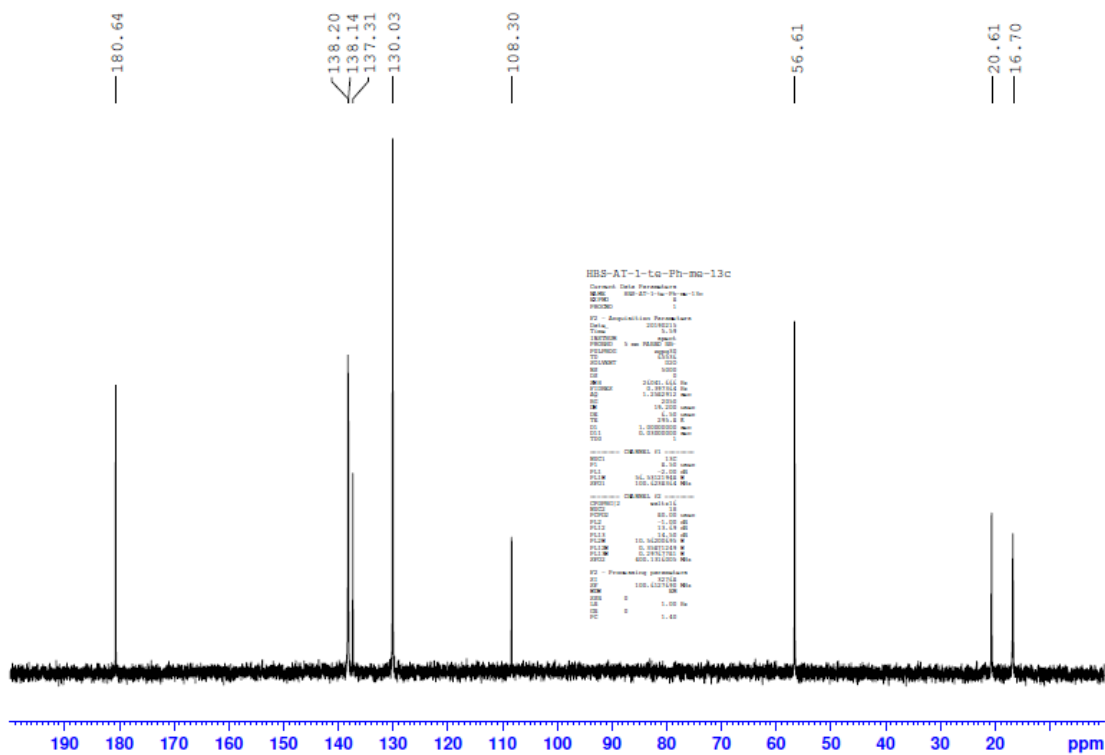

Figure S15.  $^{13}\text{C}$  NMR spectrum of compound **9**

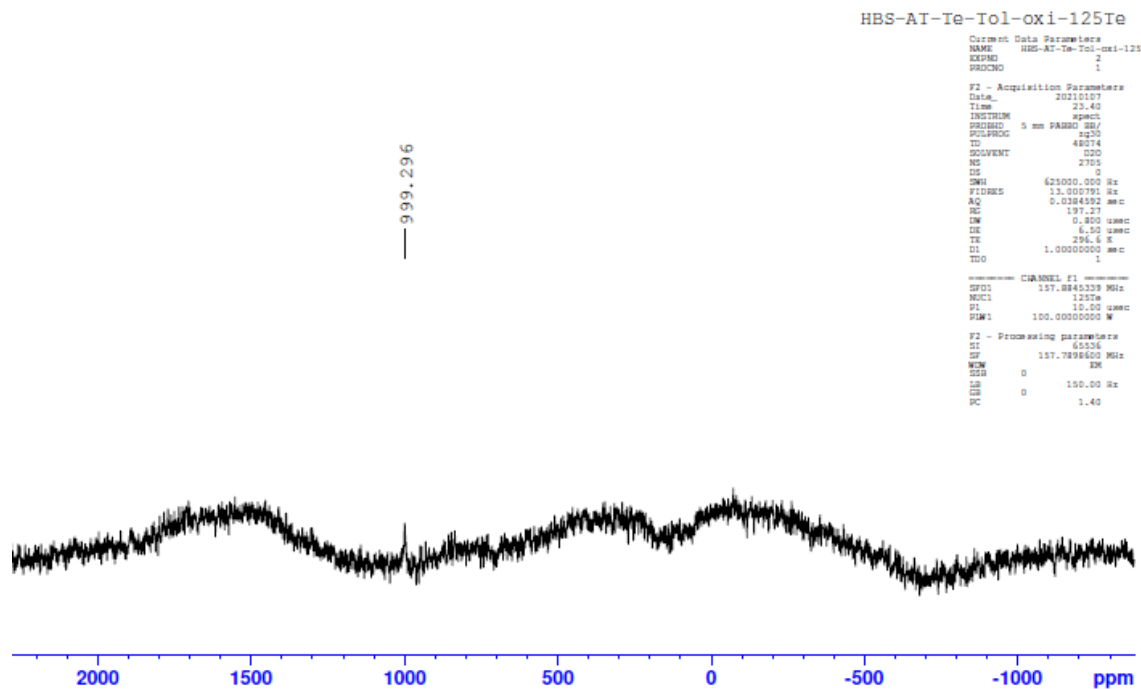

Figure S16.  $^{125}\text{Te}$  NMR spectrum of compound **9**

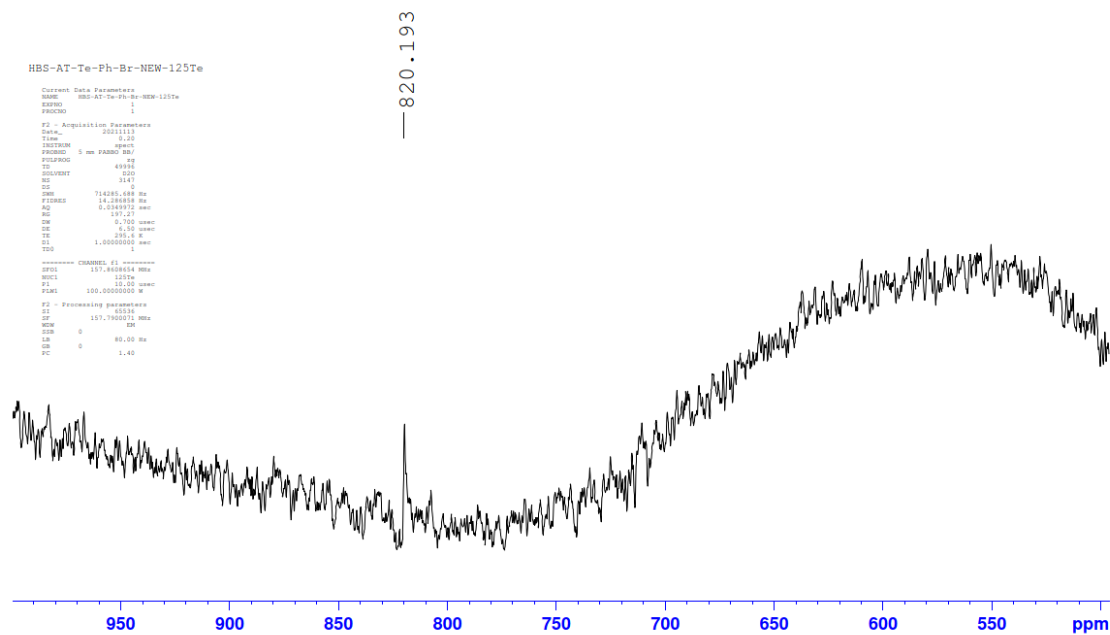

**Figure S17.**  $^{125}\text{Te}$  NMR spectrum of the reaction aliquot of **6** with  $\text{H}_2\text{O}_2/\text{HBr}$ .

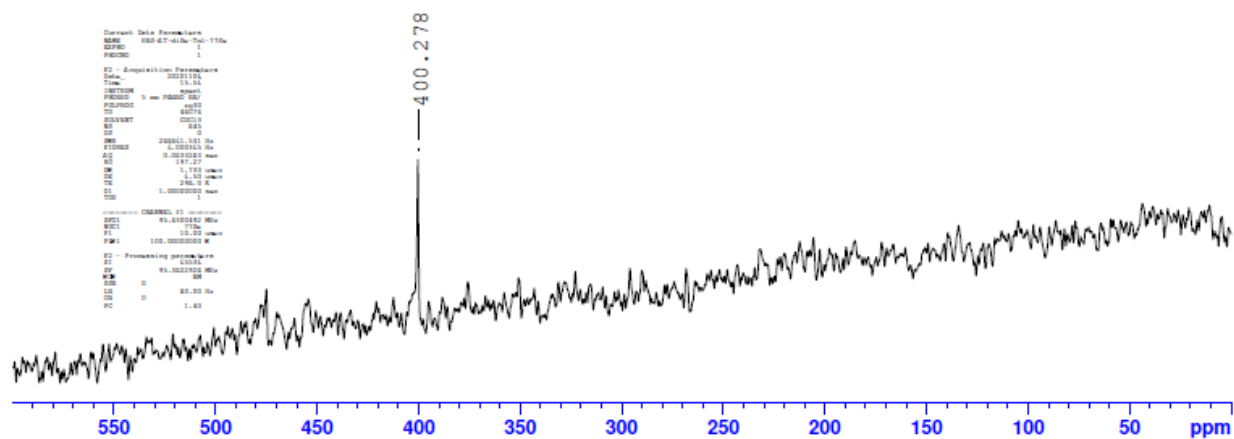

**Figure S18.**  $^{77}\text{Se}$  NMR spectrum of compound **12**

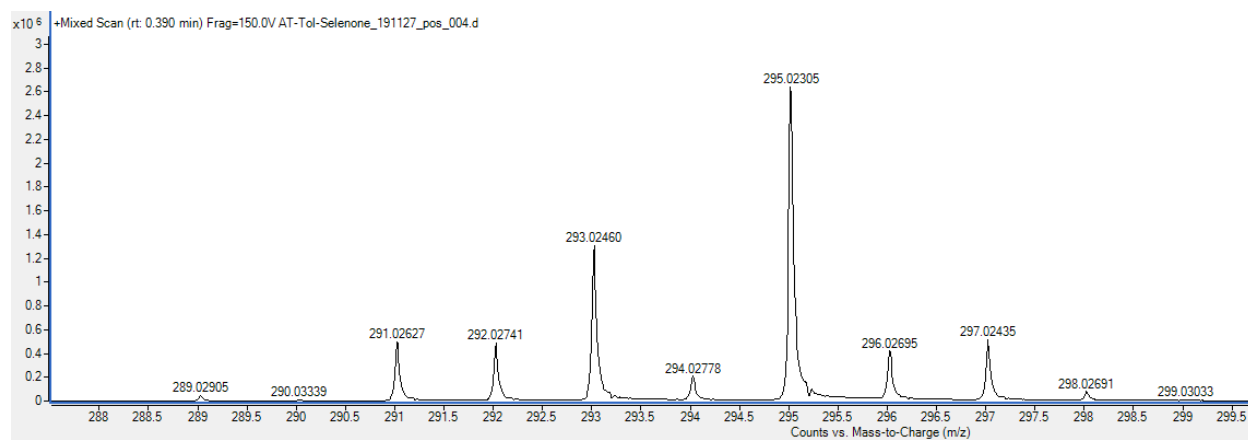

**Figure S19.** HR-MS spectrum of compound **14**

**Agilent Resolutions Pro**

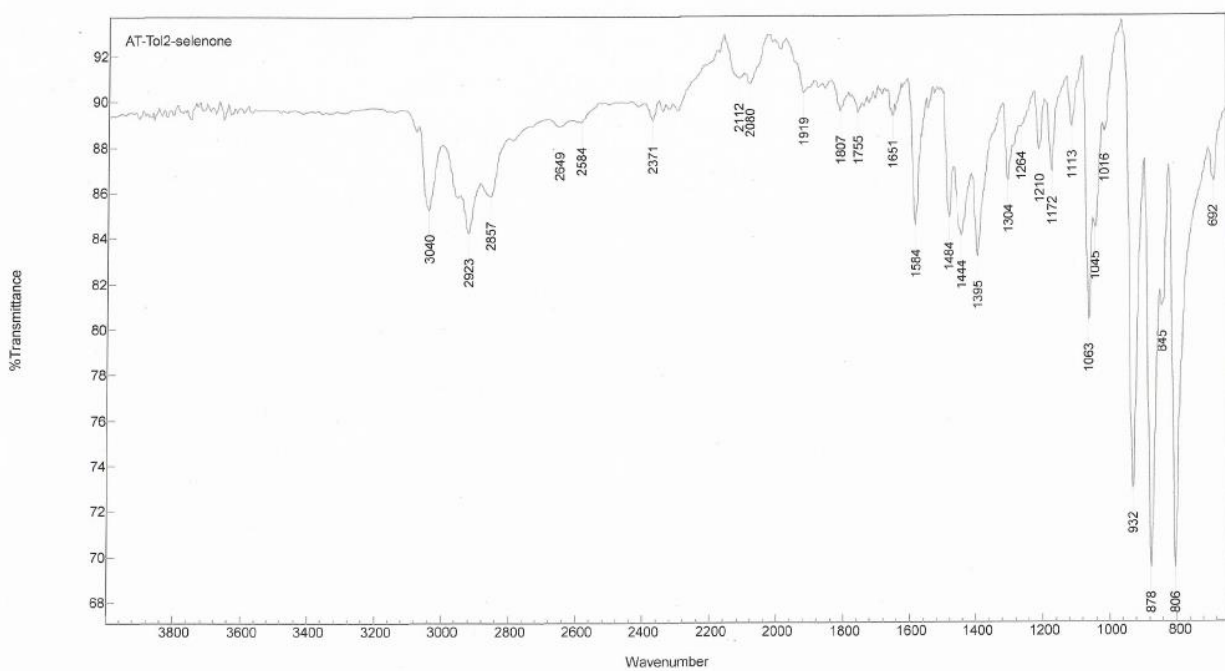

**Figure S20.** FT-IR spectrum of compound **14**

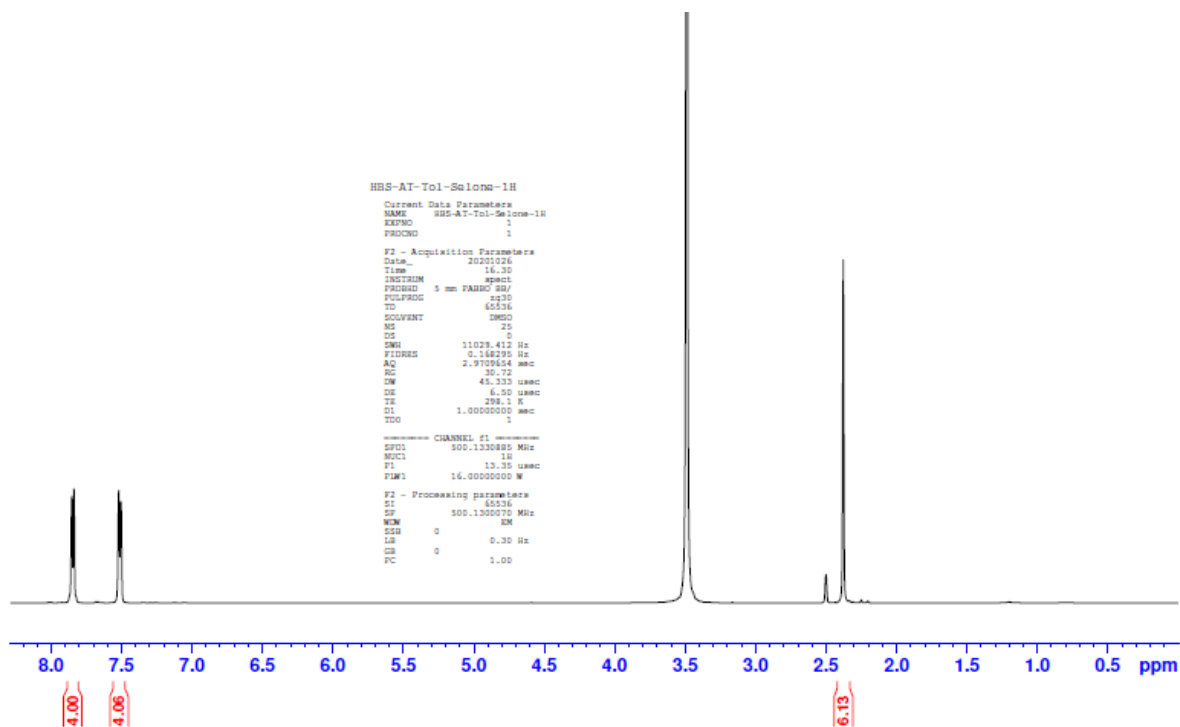

Figure S21. <sup>1</sup>H NMR spectrum of compound 14

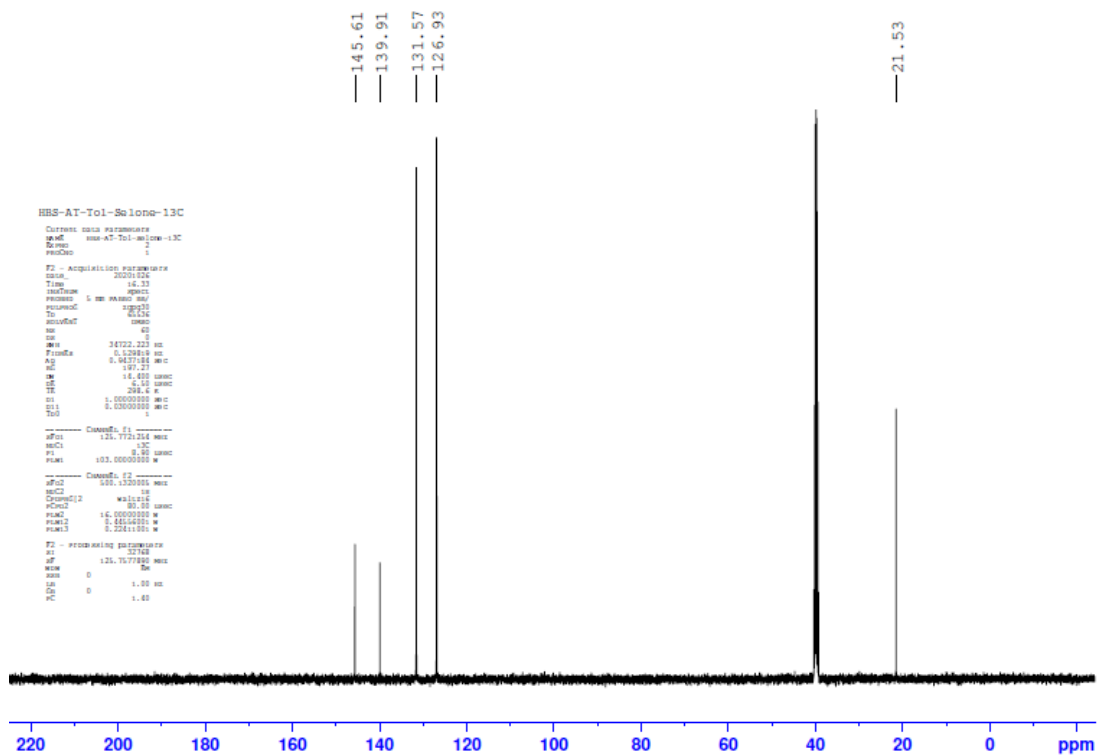

Figure S22. <sup>13</sup>C NMR spectrum of compound 14

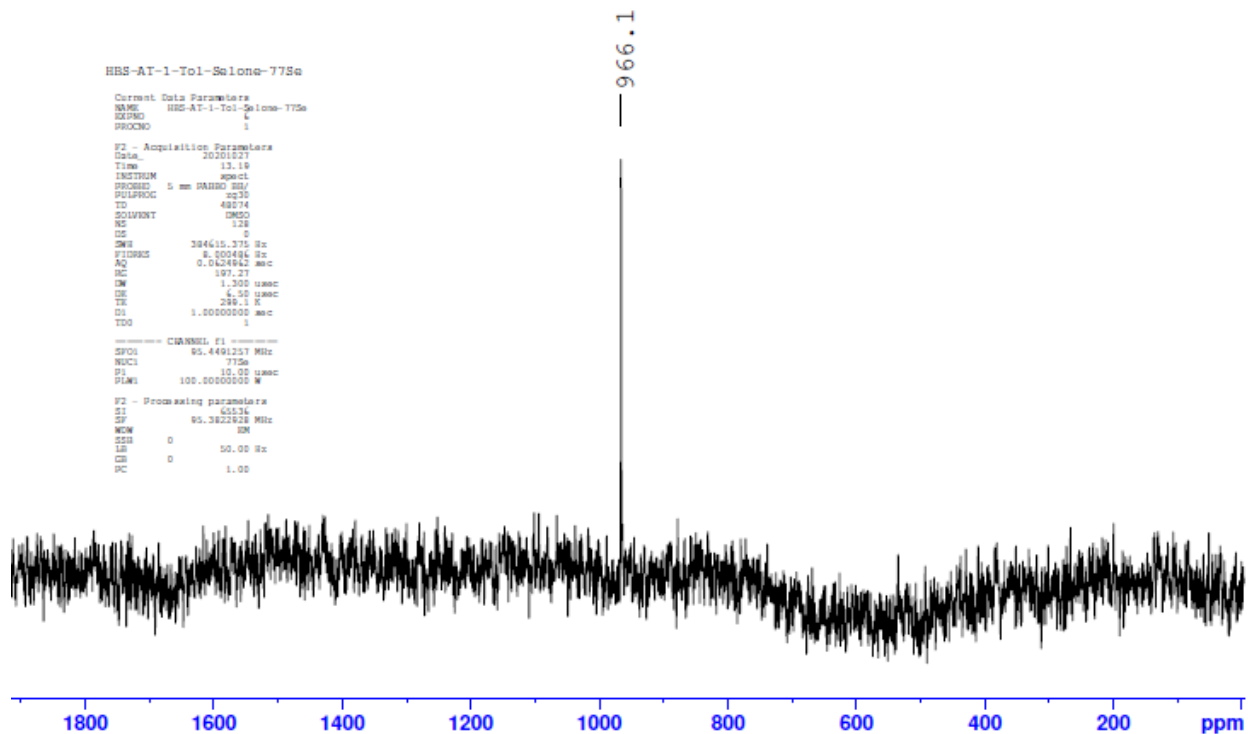

Figure S23.  $^{77}\text{Se}$  NMR spectrum of compound 14

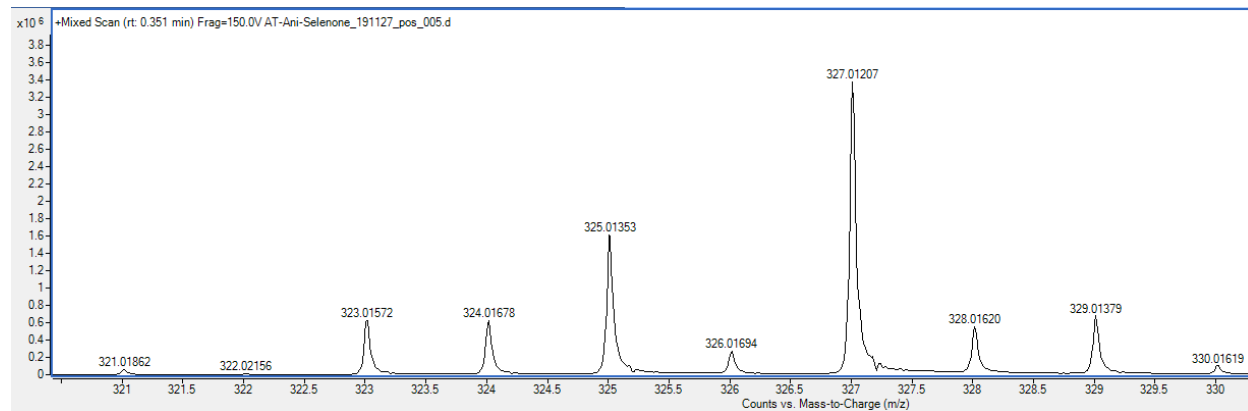

Figure S24. HR-MS spectrum of compound 15

Agilent Resolutions Pro

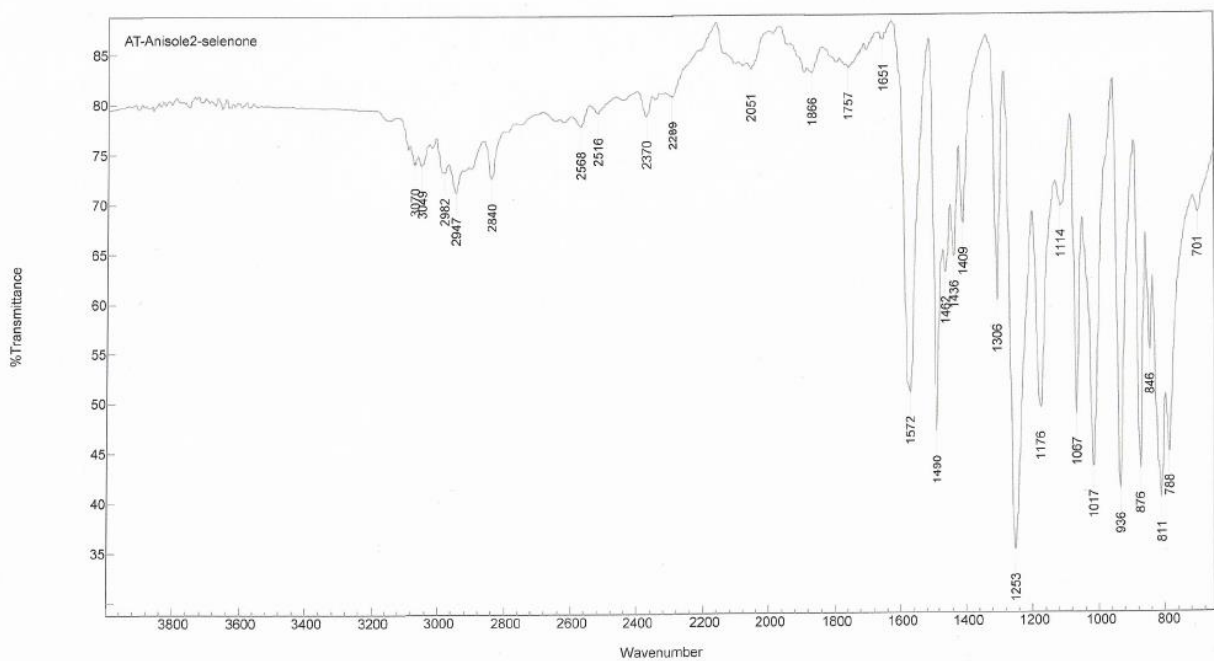

Figure S25. FT-IR spectrum of compound 15

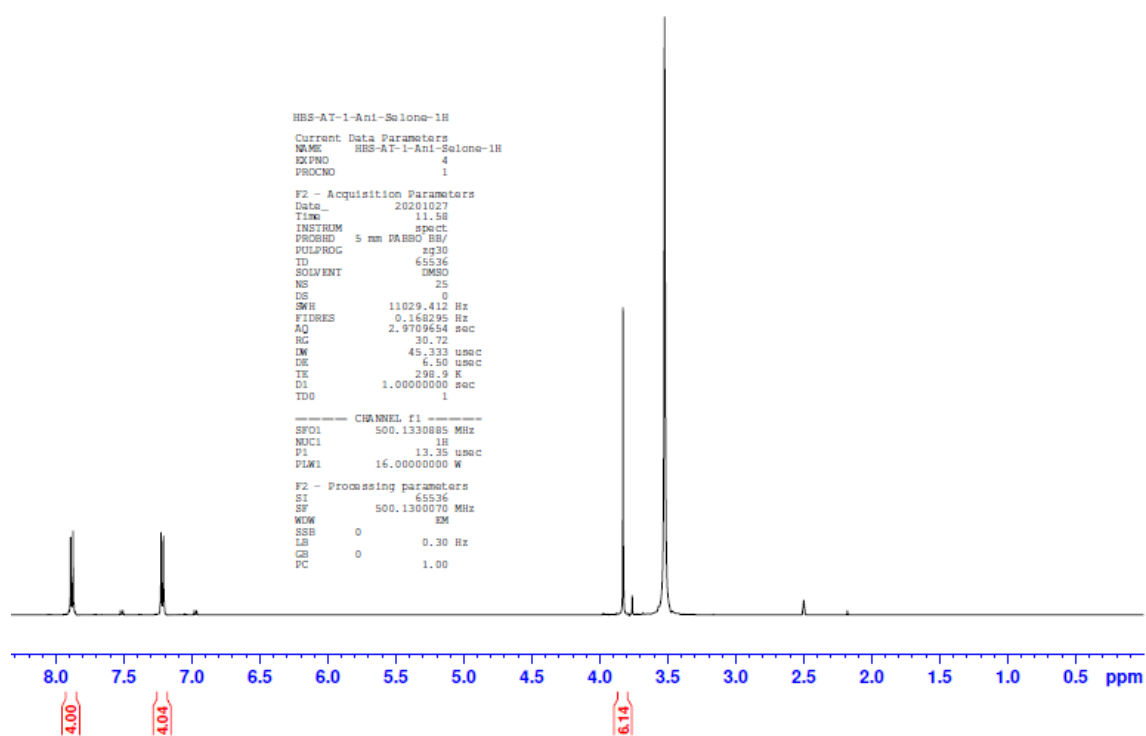

Figure S26. <sup>1</sup>H NMR spectrum of compound 15

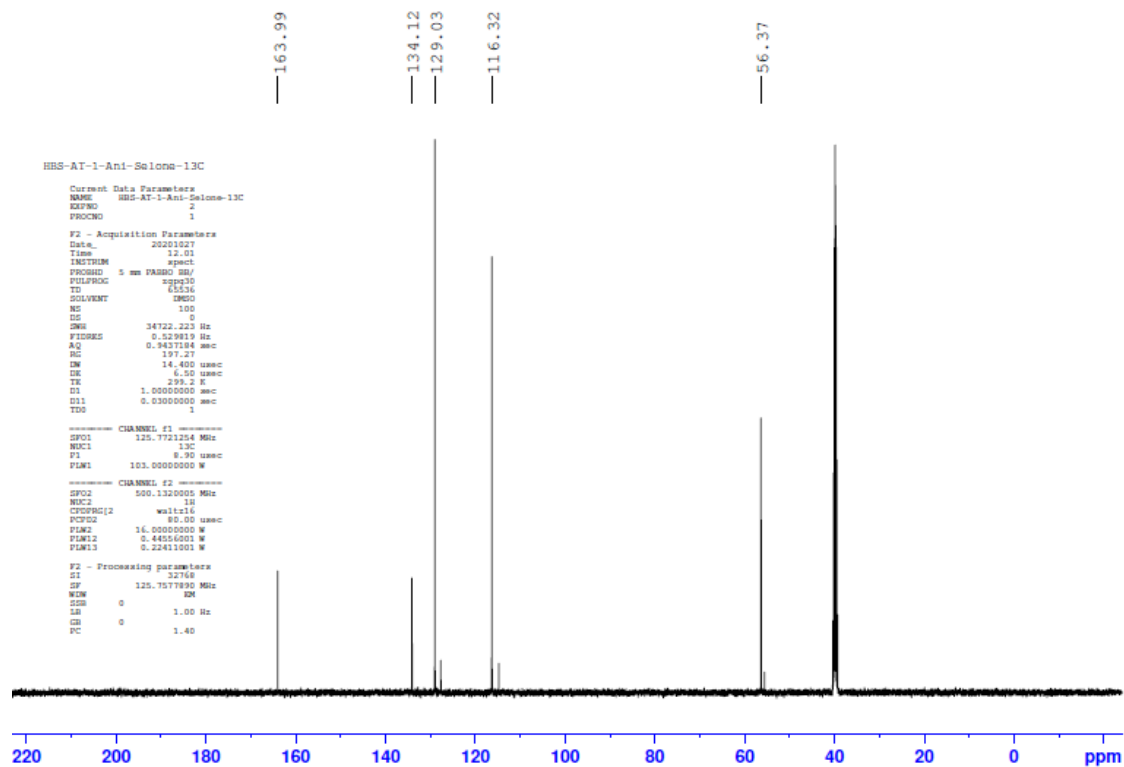

Figure S27.  $^{13}\text{C}$  NMR spectrum of compound 15

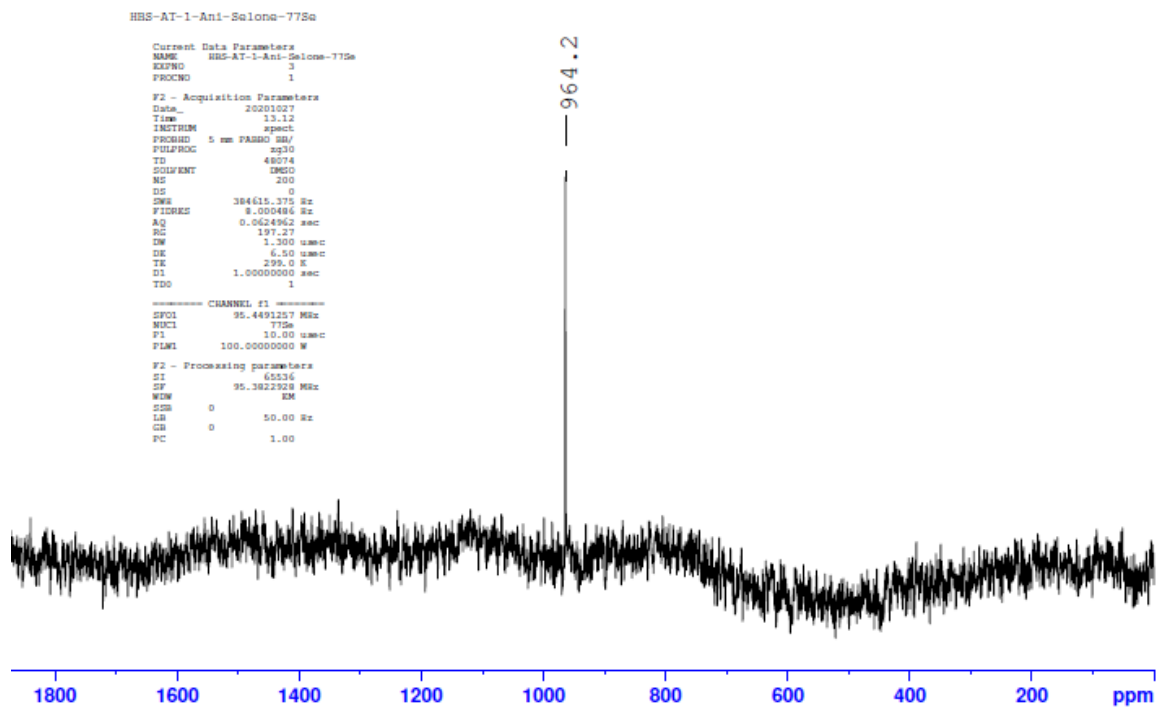

Figure S28.  $^{77}\text{Se}$  NMR spectrum of compound 15



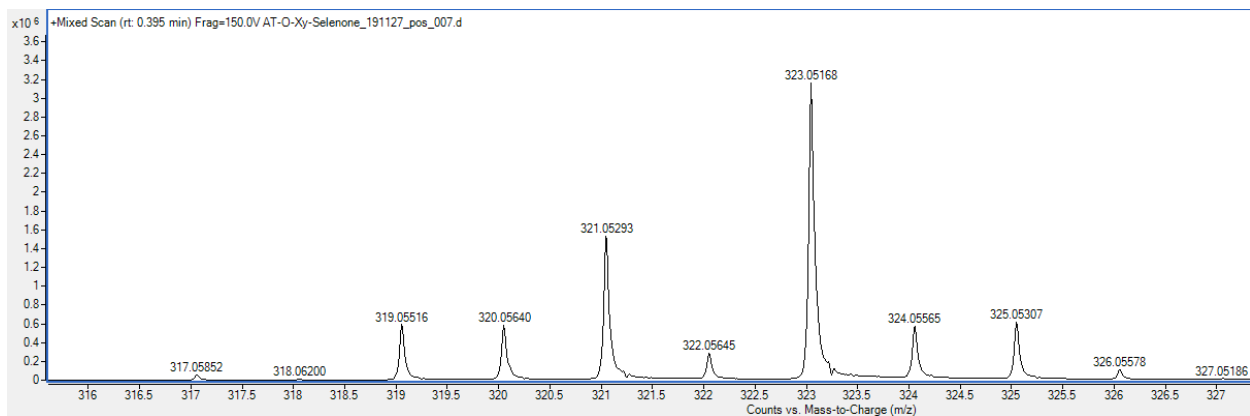

**Figure S29.** HR-MS spectrum of compound **16**

*Agilent Resolutions Pro*

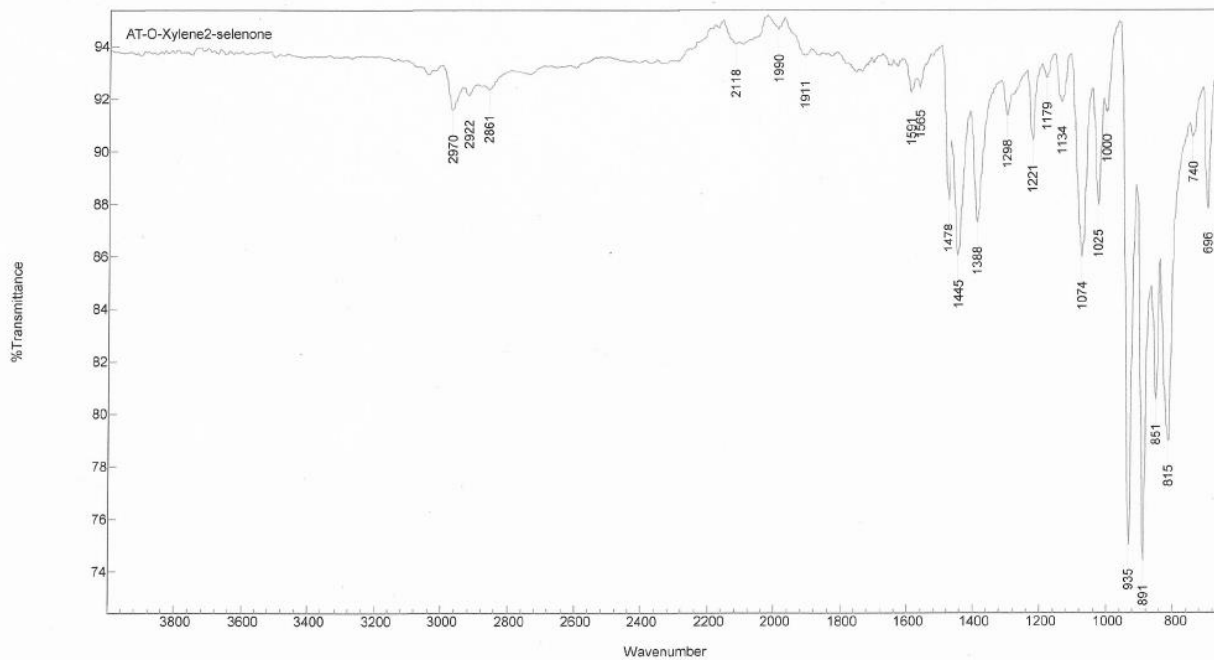

**Figure S30.** FT-IR spectrum of compound **16**

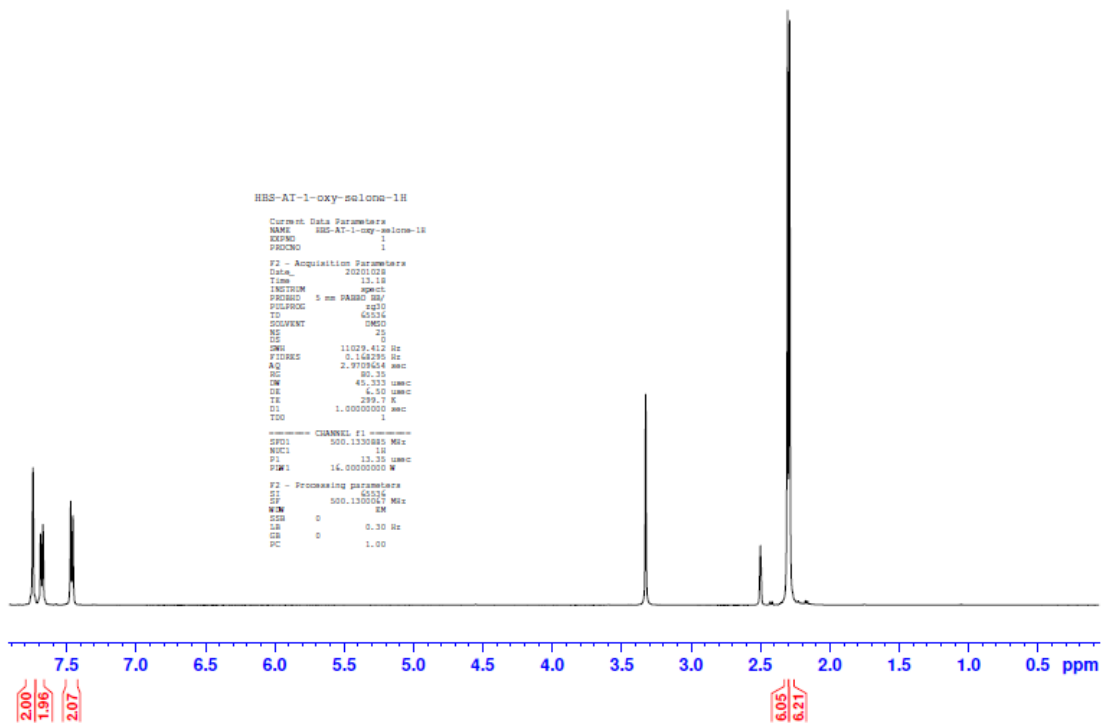

Figure S31.  $^1\text{H}$  NMR spectrum of compound **16**

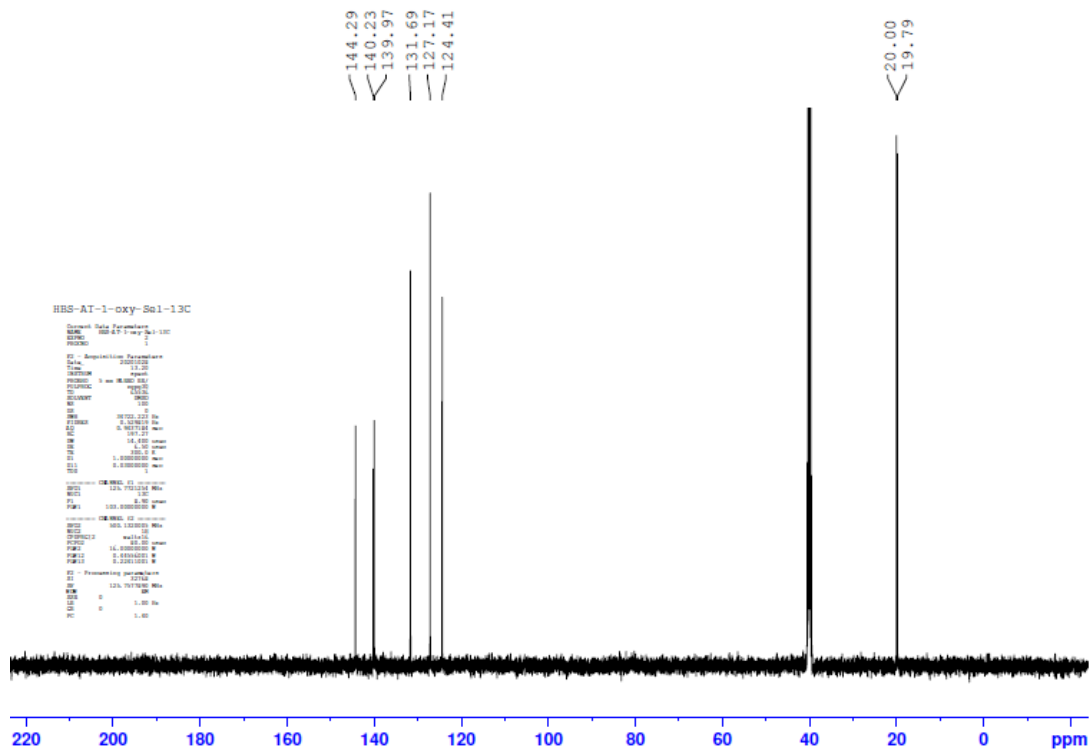

Figure S32.  $^{13}\text{C}$  NMR spectrum of compound **16**

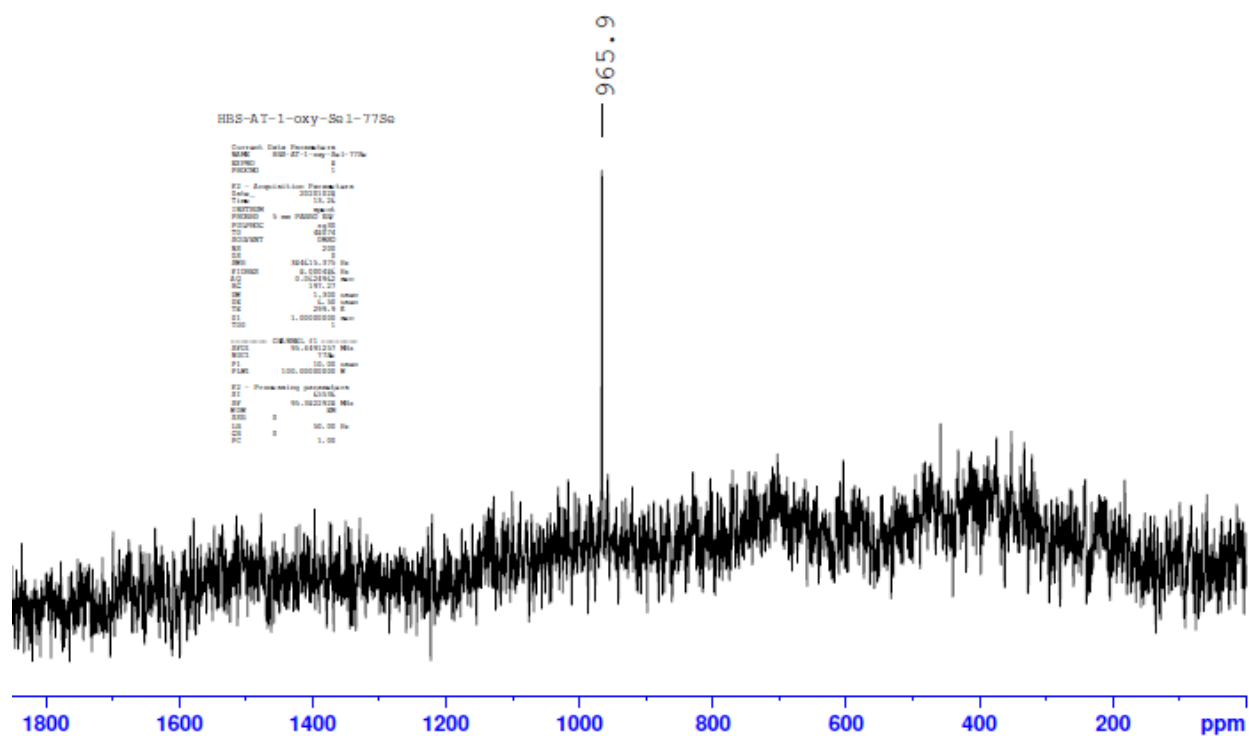

Figure S33.  $^{77}\text{Se}$  NMR spectrum of compound **16**

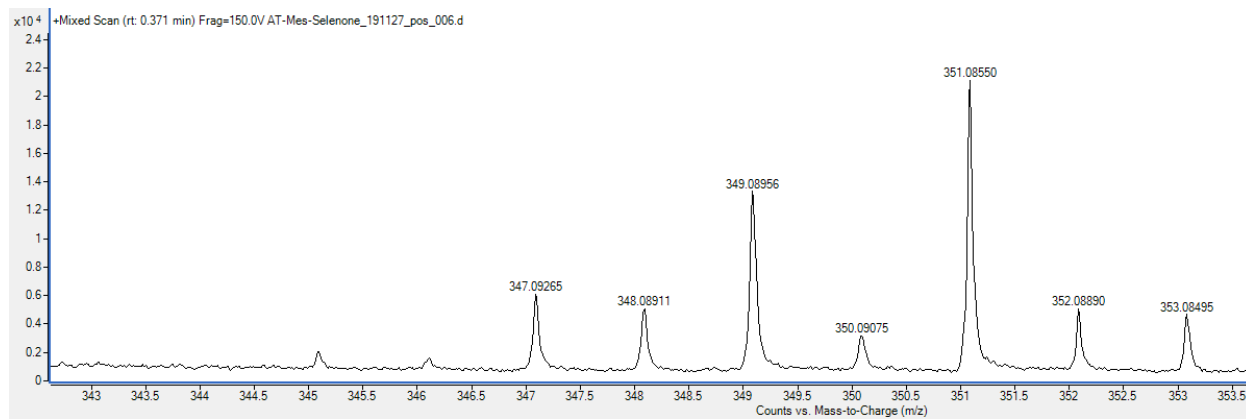

Figure S34. HR-MS spectrum of compound **17**

Agilent Resolutions Pro

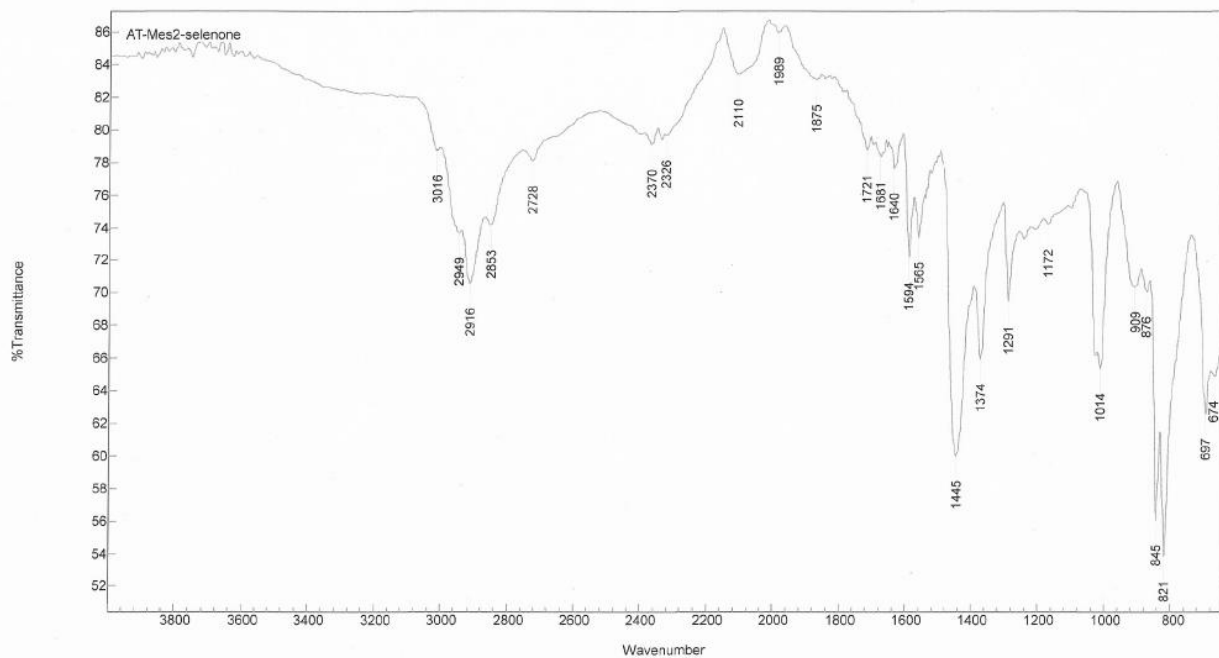

Figure S35. FT-IR spectrum of compound 17

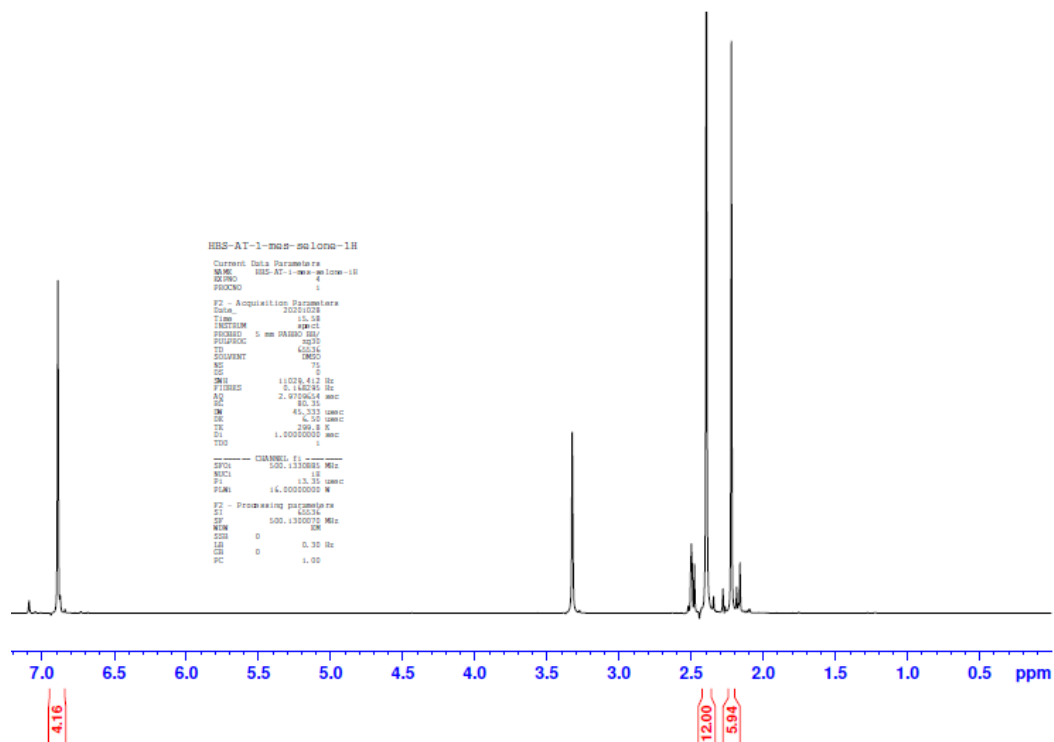

Figure S36. <sup>1</sup>H NMR spectrum of compound 17

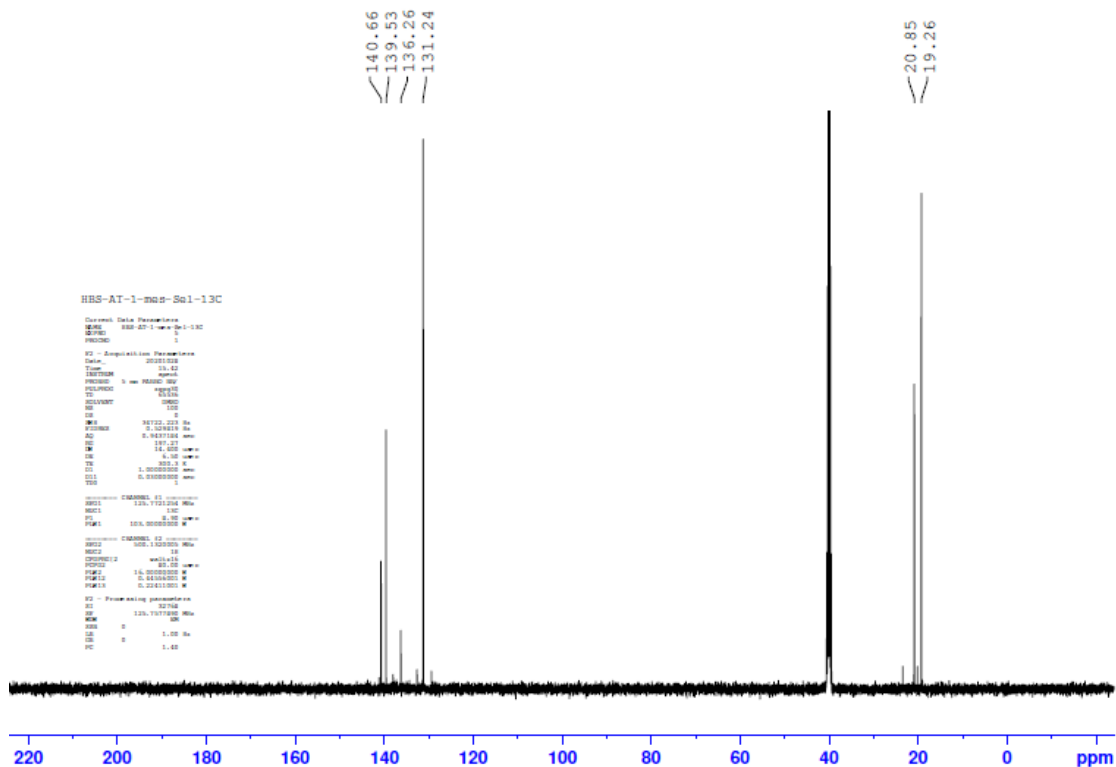

Figure S37. <sup>13</sup>C NMR spectrum of compound 17

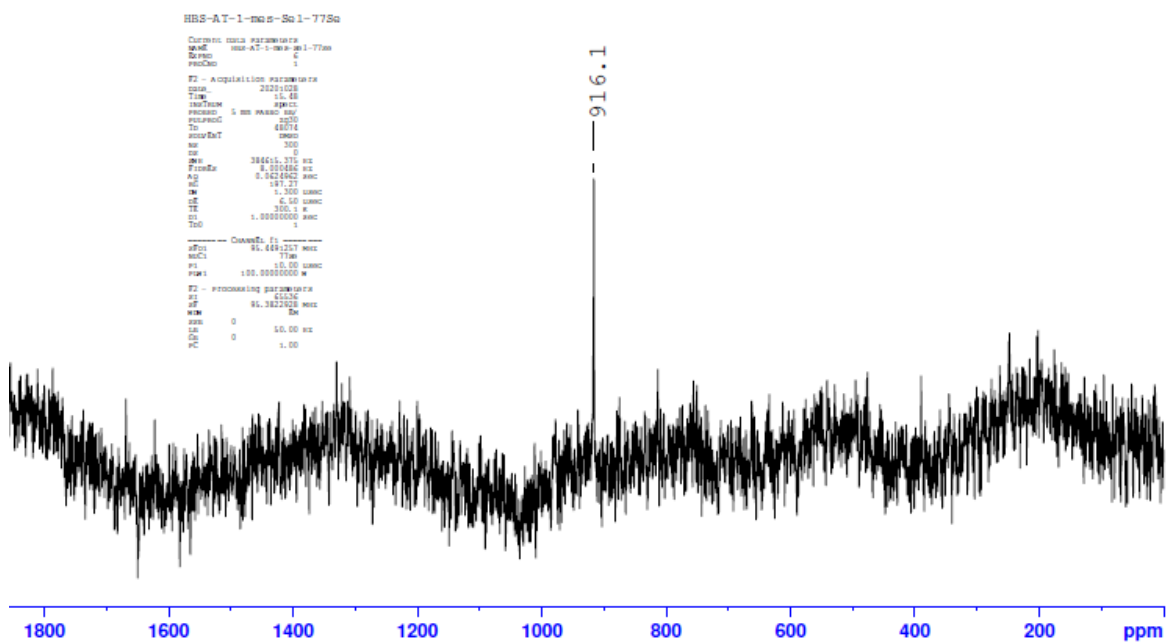

Figure S38. <sup>77</sup>Se NMR spectrum of compound 17

## Mechanism for the synthesis of **9**

The mechanism for the formation of **9** involves the initial formation of dichlorotellurane species **9a**. Due to a possible hyperconjugation effect a facile HCl elimination took place to result in intermediate **9b**. In the subsequent step, a nucleophilic attack of the carboxylate group to the Te center followed by re-aromatization afforded the cyclic compound **9**.

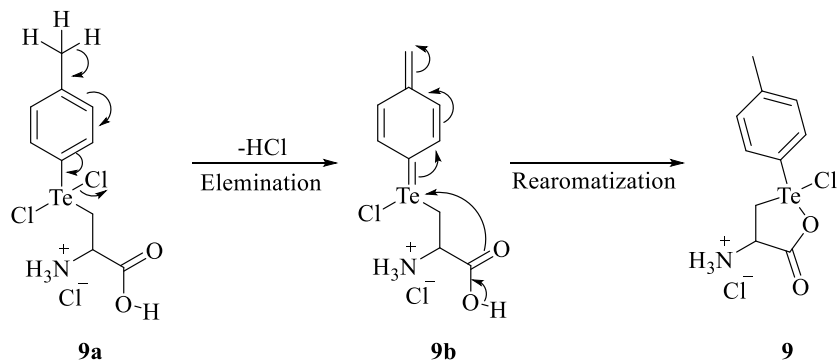

**Scheme S1.** Plausible mechanism for the formation of compound **9**.

**Table S1.** Crystallographic data and refinement details for compounds **5**, **8**, **9**, **14**, **15**, **16**, and **17**

| Compound                                | <b>5</b>                                                          | <b>8</b>                                                                                            | <b>9</b>                                                           | <b>14</b>                                         | <b>15</b>                                         | <b>16</b>                                         | <b>17</b>                                         |
|-----------------------------------------|-------------------------------------------------------------------|-----------------------------------------------------------------------------------------------------|--------------------------------------------------------------------|---------------------------------------------------|---------------------------------------------------|---------------------------------------------------|---------------------------------------------------|
| <b>Formula</b>                          | C <sub>3</sub> H <sub>10</sub> Br <sub>3</sub> NO <sub>4</sub> Te | C <sub>18.89</sub> H <sub>32</sub> Cl <sub>6</sub> N <sub>2</sub> O <sub>7.11</sub> Te <sub>2</sub> | C <sub>10</sub> H <sub>15</sub> Cl <sub>2</sub> NO <sub>3</sub> Te | C <sub>14</sub> H <sub>14</sub> O <sub>2</sub> Se | C <sub>14</sub> H <sub>14</sub> O <sub>4</sub> Se | C <sub>16</sub> H <sub>18</sub> O <sub>2</sub> Se | C <sub>18</sub> H <sub>22</sub> O <sub>2</sub> Se |
| <b>Crystal System</b>                   | Orthorhombic                                                      | monoclinic                                                                                          | monoclinic                                                         | monoclinic                                        | monoclinic                                        | triclinic                                         | monoclinic                                        |
| <b>Space group</b>                      | <i>P</i> 2 <sub>1</sub> 2 <sub>1</sub> 2 <sub>1</sub>             | <i>C</i> 2                                                                                          | <i>C</i> 2                                                         | <i>P</i> 2 <sub>1</sub> / <i>c</i>                | <i>P</i> 2 <sub>1</sub> / <i>n</i>                | <i>P</i> -1                                       | <i>C</i> 2/ <i>c</i>                              |
| <b>T/K</b>                              | 123.00(10)                                                        | 100(2)                                                                                              | 100(2)                                                             | 123.00(10)                                        | 123.00(10)                                        | 122.99(10)                                        | 100(2)                                            |
| <b>a [Å]</b>                            | 5.85996(15)                                                       | 13.6819(2)                                                                                          | 32.2340(6)                                                         | 8.9483(4)                                         | 7.41562(5)                                        | 7.8964(16)                                        | 13.1440(3)                                        |
| <b>b [Å]</b>                            | 9.5789(3)                                                         | 9.2677(10)                                                                                          | 5.6150(11)                                                         | 14.4494(5)                                        | 8.19270(5)                                        | 8.4010(17)                                        | 9.1631(18)                                        |
| <b>c [Å]</b>                            | 20.0889(5)                                                        | 24.7845(4)                                                                                          | 7.6100(15)                                                         | 9.9106(4)                                         | 21.78490(14)                                      | 11.5880(2)                                        | 13.2700(3)                                        |
| <b>α [°]</b>                            | 90                                                                | 90                                                                                                  | 90                                                                 | 90                                                | 90                                                | 92.16(3)                                          | 90                                                |
| <b>β [°]</b>                            | 90                                                                | 100.1830(10)                                                                                        | 100.28(3)                                                          | 106.30(4)                                         | 93.5017(6)                                        | 96.22(3)                                          | 102.61(3)                                         |
| <b>γ [°]</b>                            | 90                                                                | 90                                                                                                  | 90                                                                 | 90                                                | 90                                                | 106.84(3)                                         | 90                                                |
| <b>V [Å<sup>3</sup>]</b>                | 1127.62(5)                                                        | 3093.17(8)                                                                                          | 1355.20(5)                                                         | 1229.90(9)                                        | 1321.05(15)                                       | 729.50(3)                                         | 1559.8(6)                                         |
| <b>Z</b>                                | 4                                                                 | 4                                                                                                   | 4                                                                  | 4                                                 | 4                                                 | 2                                                 | 4                                                 |
| <b>ρ<sub>calc</sub>/cm<sup>3</sup></b>  | 2.895                                                             | 1.866                                                                                               | 1.939                                                              | 1.584                                             | 1.635                                             | 1.463                                             | 1.487                                             |
| <b>μ/mm<sup>-1</sup></b>                | 13.249                                                            | 20.001                                                                                              | 2.585                                                              | 3.039                                             | 3.931                                             | 2.569                                             | 2.410                                             |
| <b>GOF</b>                              | 1.004                                                             | 1.081                                                                                               | 1.112                                                              | 1.006                                             | 1.107                                             | 1.086                                             | 1.025                                             |
| <b>2θ range (deg)</b>                   | 7.244 to 63.704                                                   | 7.248 to 155.306                                                                                    | 2.568 to 52.032                                                    | 7.080 to 64.196                                   | 8.132 to 154.908                                  | 3.540 to 53.470                                   | 5.950 to 53.480                                   |
| <b>Refs collected</b>                   | 10892                                                             | 6551                                                                                                | 8390                                                               | 13287                                             | 23988                                             | 22156                                             | 12872                                             |
| <b>Unique/observed</b>                  | 3186                                                              | 6551                                                                                                | 2559                                                               | 3493                                              | 2814                                              | 3081                                              | 1655                                              |
| <b>Parameters</b>                       | 123                                                               | 375                                                                                                 | 163                                                                | 156                                               | 175                                               | 244                                               | 99                                                |
| <b>R<sub>int</sub></b>                  | 0.0359                                                            | 0.0793                                                                                              | 0.0624                                                             | 0.0481                                            | 0.0455                                            | 0.1405                                            | 0.0432                                            |
| <b>R<sub>1</sub>, wR2[I &gt; 2σ(I)]</b> | 0.0222, 0.0429                                                    | 0.0635, 0.1668                                                                                      | 0.0281, 0.0664                                                     | 0.0353, 0.0814                                    | 0.0259, 0.0679                                    | 0.0440, 0.1197                                    | 0.0359, 0.0943                                    |
| <b>R<sub>1</sub>, wR2[All data]</b>     | 0.0245, 0.0433                                                    | 0.0636, 0.1669                                                                                      | 0.0282, 0.0664                                                     | 0.0560, 0.0880                                    | 0.0264, 0.0683                                    | 0.0444, 0.1203                                    | 0.0360, 0.0943                                    |

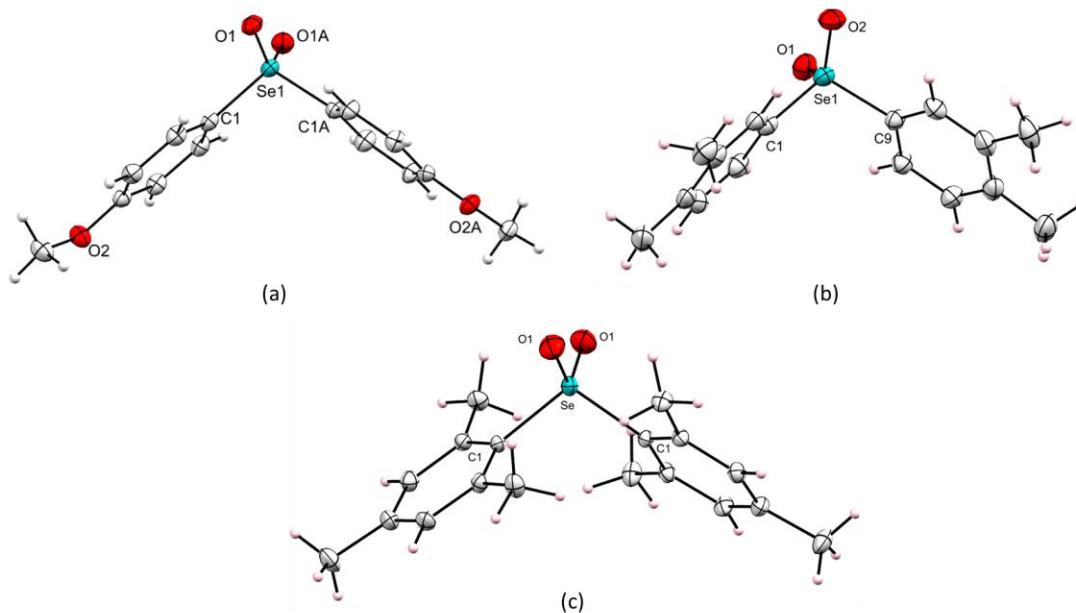

**Figure S39.** Molecular structures of **15-17**; thermal ellipsoids are set at the 50 % probability level

**Table S2.** The important geometrical parameters of compound **5**

| Bond length(Å)/<br>Bond Angle (°) | <b>5</b>  |
|-----------------------------------|-----------|
| Te(1) – Br(1) Å                   | 2.704(6)  |
| Te(1) – Br(2) Å                   | 2.665(6)  |
| Te(1) – Br(3) Å                   | 2.655(6)  |
| Te(1) – C(1) Å                    | 2.150(5)  |
| Te(1) – O(1) Å                    | 2.141(3)  |
| C(3) – O(1) Å                     | 1.295(6)  |
| C(3) – O(2) Å                     | 1.219(6)  |
| Br(1) – Te(1) – Br(2) °           | 89.39(2)  |
| Br(3) – Te(1) – Br(2) °           | 89.59(2)  |
| Br(1) – Te(1) – Br(3) °           | 174.94(2) |
| O(1) – Te(1) – C(1) °             | 80.10(1)  |



**Table S3.** The important geometrical parameters of compound **8**

| Bond length(Å)/<br>Bond Angle (°) | <b>8</b>  |
|-----------------------------------|-----------|
| Te(1) – Cl(1A) Å                  | 2.544(4)  |
| Te(1) – Cl(2A) Å                  | 2.482(4)  |
| Te(2) – Cl(1B) Å                  | 2.531(4)  |
| Te(2) – Cl(2B) Å                  | 2.485(4)  |
| Te(1) – C(1A) Å                   | 2.120(2)  |
| Te(1) – C(7A) Å                   | 2.132(1)  |
| Te(2) – C(1B) Å                   | 2.106(2)  |
| Te(2) – C(7B) Å                   | 2.153(2)  |
| C(9A) – O(1A) Å                   | 1.319(2)  |
| C(9A) – O(2A) Å                   | 1.220(2)  |
| C(9B) – O(1B) Å                   | 1.339(2)  |
| C(9B) – O(2B) Å                   | 1.209(2)  |
| Cl(1A) – Te(1) – Cl(2A) °         | 171.22(1) |
| Cl(1B) – Te(2) – Cl(2B) °         | 172.38(1) |
| C(1A) – Te(1) – C(7A) °           | 99.56(6)  |
| C(1B) – Te(2) – C(7B) °           | 96.56(6)  |

**Table S4.** The important geometrical parameters of compound **9**

| Bond length(Å)/<br>Bond Angle (°) | <b>9</b>  |
|-----------------------------------|-----------|
| Te(1) – Cl(1) Å                   | 2.466(2)  |
| Te(1) – C(3) Å                    | 2.124(6)  |
| Te(1) – C(4) Å                    | 2.117(5)  |
| Te(1) – O(1) Å                    | 2.160(4)  |
| C(1) – O(1) Å                     | 1.314(7)  |
| C(1) – O(2) Å                     | 1.206(7)  |
| C(3) – Te(1) – Cl(1) °            | 89.20(1)  |
| C(4) – Te(1) – Cl(1) °            | 89.50(1)  |
| C(3) – Te(1) – C(4) °             | 98.10(2)  |
| O(1) – Te(1) – Cl(1) °            | 168.00(1) |
| O(1) – Te(1) – C(3) °             | 79.72(2)  |

**Table S5.** Comparison of the important geometrical parameters of compounds **14-17**

| Bond length(Å)/<br>Bond Angle (°) | <b>14</b> | <b>15</b> | <b>16</b> | <b>17</b>  |
|-----------------------------------|-----------|-----------|-----------|------------|
| Se(1) – O(1) Å                    | 1.627(2)  | 1.620(1)  | 1.620(2)  | 1.609(2)   |
| Se(1) – O(1A) Å                   | 1.620(2)  | 1.619(1)  | 1.620(2)  | 1.609(2)   |
| Se(1) – C(1) Å                    | 1.904(3)  | 1.908(2)  | 1.903(3)  | 1.952      |
| Se(1) – C(1A) Å                   | 1.914(3)  | 1.903(2)  | 1.912(3)  | 1.952      |
| O(1) – Se(1) – O(1A) °            | 117.87(9) | 119.36(7) | 118.37(1) | 114.49(1)* |
| C(1) – Se(1) – O(1) °             | 108.07(1) | 107.17(7) | 107.30(1) | 106.17     |
| C(1) – Se(1) – O(1A) °            | 108.24(1) | 106.46(7) | 108.19(1) | 111.38     |
| C(1A) – Se(1) – O(1) °            | 108.51(1) | 107.46(7) | 108.19(1) | 111.38     |
| C(1A) – Se(1) – O(1A) °           | 108.11(1) | 108.89(7) | 108.35(1) | 106.17     |
| C(1) – Se(1) – C(1A) °            | 105.34(1) | 106.87(7) | 105.76(1) | 107.10     |

\*For **17**, bond angle is O(1)<sup>1</sup> – Se(1) – O(1)

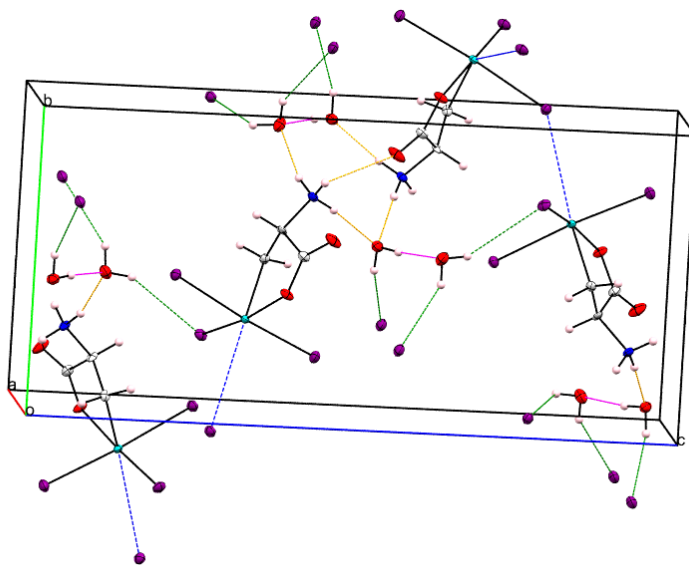

**Figure S40.** Packing diagram of compound **5**

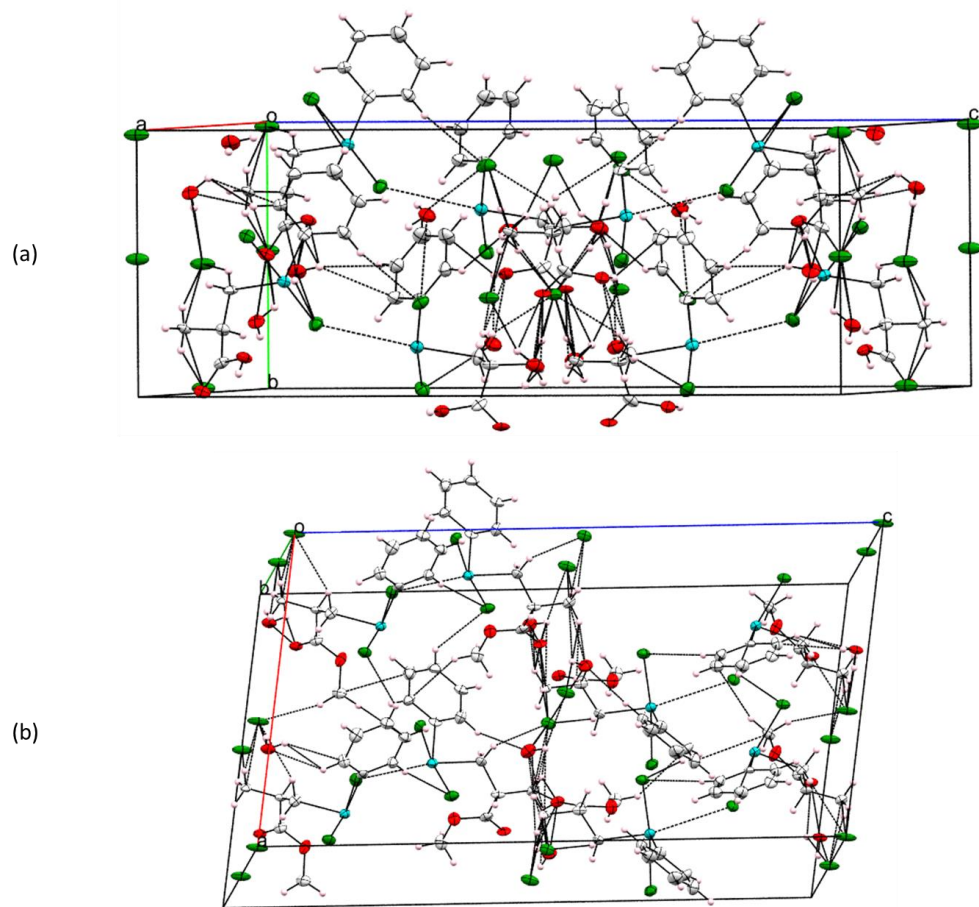

**Figure S41.** Packing diagram of compound **8** (a) and its methyl ester derivative (b)

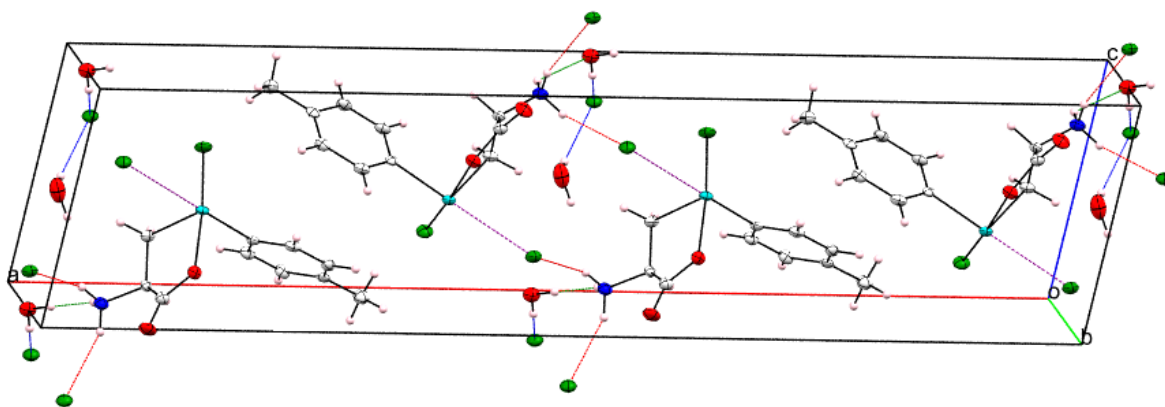

**Figure S42.** Packing diagram of compound **9**

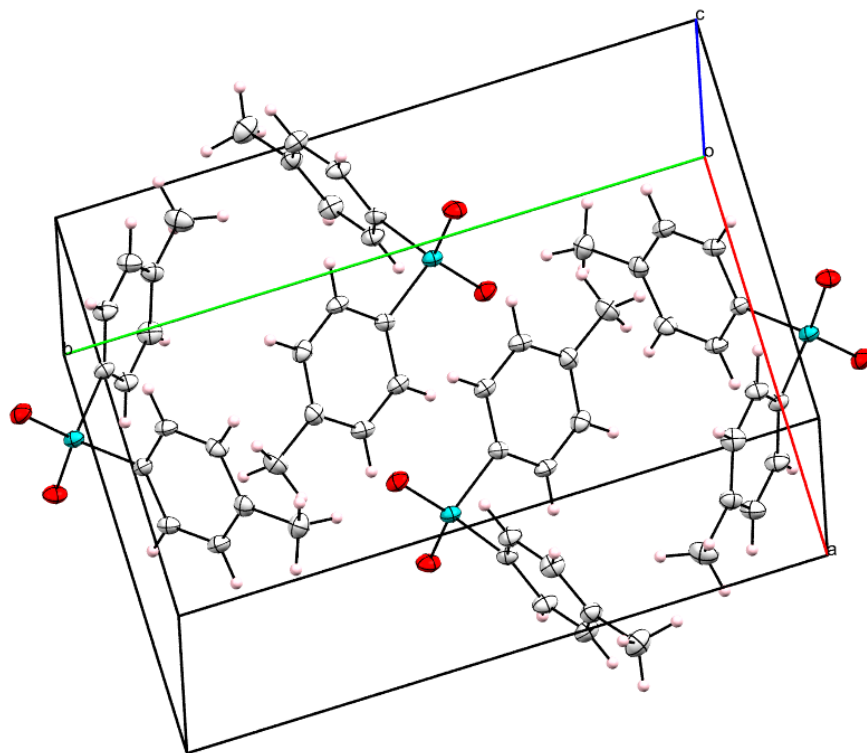

**Figure S43.** Packing diagram of compound **14**

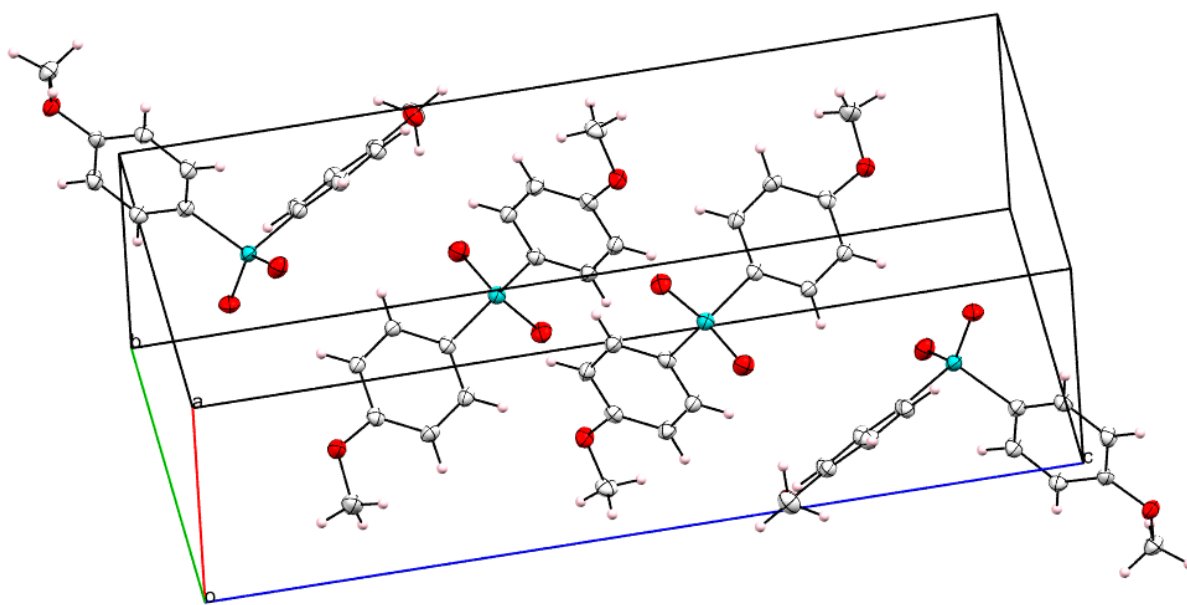

**Figure S44.** Packing diagram of compound **15**

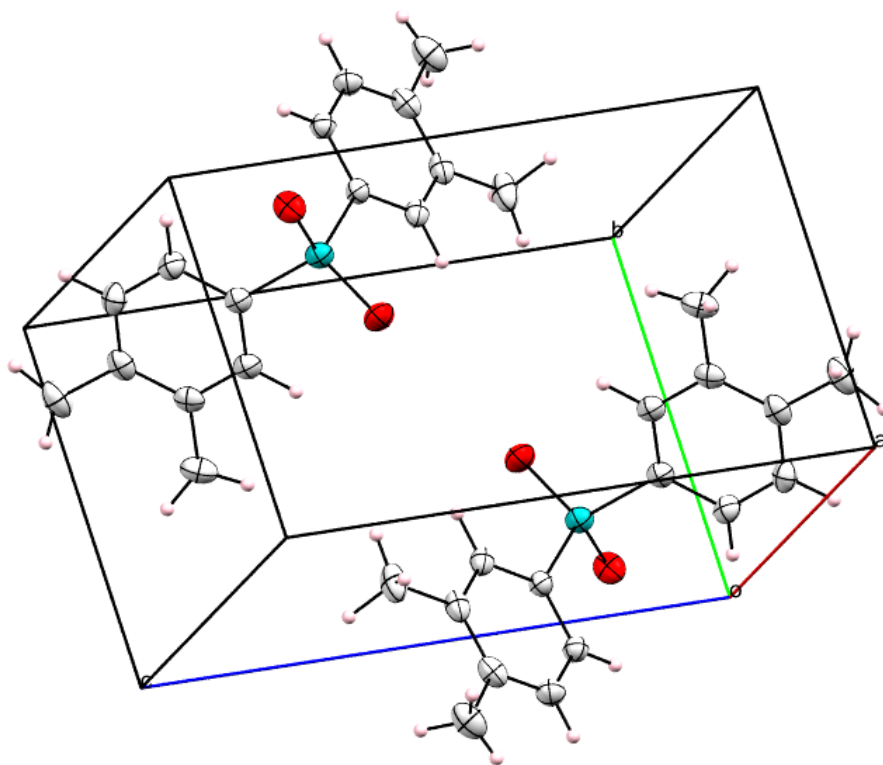

**Figure S45.** Packing diagram of compound **16**

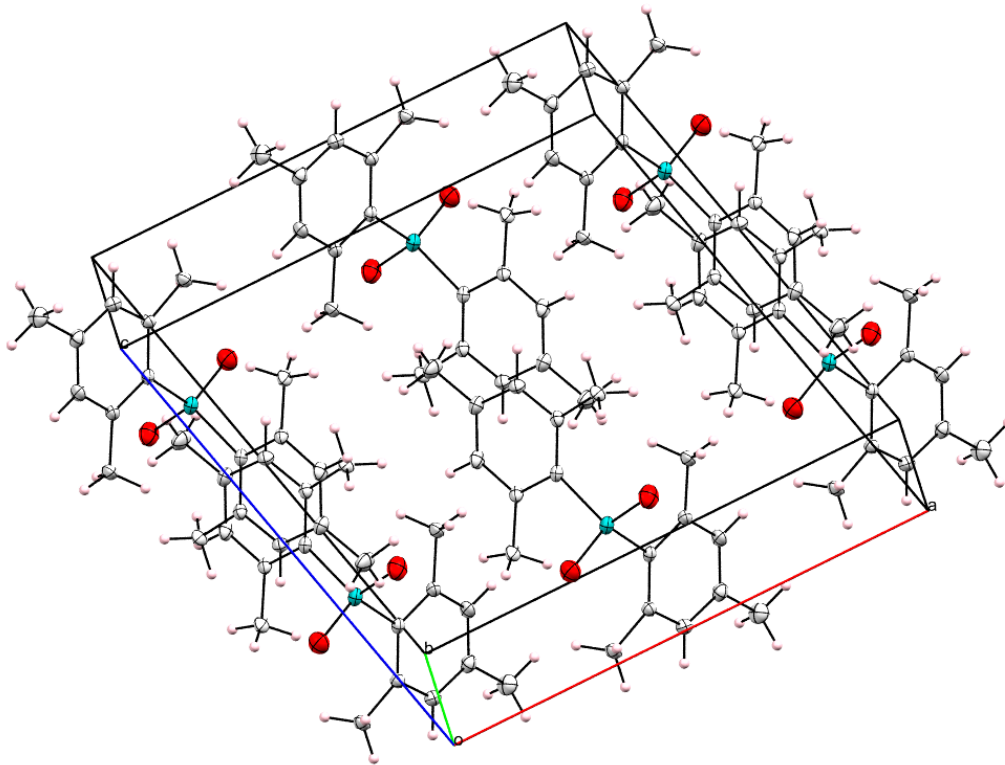

**Figure S46.** Packing diagram of compound **17**
